# Supplementary material for: Combining robotic training and inactivation of the healthy hemisphere restores pre-stroke motor patterns in mice
Source: eLife journal article supplement (doi:10.7554/elife.28662), 2017-12-27
Supplement: supp [file elife-28662-supp-v1.zip]

Archive with 26 entries (26 files):
- elife_poa_e28662_Figure_4_figure_supplement_1.tif
- elife_poa_e28662_Figure_8_figure_supplement_2.tif
- elife_poa_e28662_Figure_1_figure_supplement_1_source_data_1.xlsx
- elife_poa_e28662_Figure_8_figure_supplement_1.tif
- elife_poa_e28662_Figure_6_figure_supplement_1_source_data_1.xlsx
- elife_poa_e28662_Figure_3_source_data_1.xlsx
- elife_poa_e28662_Figure_4_source_data_1.xlsx
- elife_poa_e28662_Figure_4_figure_supplement_1_source_data_1.xlsx
- elife_poa_e28662_Figure_3_figure_supplement_2.tif
- elife_poa_e28662_Figure_3_figure_supplement_2_source_data_1.xlsx
- elife_poa_e28662_Figure_10_figure_supplement_1_source_data_1.xlsx
- elife_poa_e28662_Figure_9_source_data_1.xlsx
- elife_poa_e28662_Figure_1_figure_supplement_1.tif
- elife_poa_e28662_Figure_1_source_data_1.xlsx
- elife_poa_e28662_Figure_8_figure_supplement_2_source_data_1.xlsx
- elife_poa_e28662_Transparent_Reporting_File.pdf
- elife_poa_e28662_Figure_7_source_data_1.xlsx
- elife_poa_e28662_Figure_2_source_data_1.xlsx
- elife_poa_e28662_Figure_8_source_data_1.xlsx
- elife_poa_e28662_Figure_10_figure_supplement_1.tif
- elife_poa_e28662_Figure_10_source_data_1.xlsx
- elife_poa_e28662_Figure_3_figure_supplement_1.tif
- elife_poa_e28662_Figure_3_figure_supplement_1_source_data_1.xlsx
- elife_poa_e28662_Figure_6_source_data_1.xlsx
- elife_poa_e28662_Figure_8_figure_supplement_1_source_data_1.xlsx
- elife_poa_e28662_Figure_6_figure_supplement_1.tif
