# Supplementary material for: Combining robotic training and inactivation of the healthy hemisphere restores pre-stroke motor patterns in mice
Source: eLife journal article supplement (doi:10.7554/elife.28662), 2017-12-27
Supplement: supp [file elife-28662-supp-v1.zip › elife_poa_e28662_Figure_1_figure_supplement_1_source_data_1.xlsx]

## Sheet: b, c
	Early negative	Early negative S.E.	Late positive	Late positive S.E.
Baseline	-1.01314	0.09986	0.27077	0.03404
Post CGP	-1.13859	0.08054	0.07278	0.04681

## Sheet: d
	Sham	SE Sham	Stroke	SE Stroke
0.05	-0.04759	0.02548	-0.07779	0.04615
0.1	-0.48552	0.10994	-0.42143	0.11951
0.15	-0.81521	0.14788	-0.43184	0.12455
0.2	-1.14679	0.18632	-0.49421	0.12785
0.25	-1.15382	0.12929	-0.68209	0.09789
0.3	-1.34253	0.15594	-0.75808	0.12087
