# Supplementary material for: Combining robotic training and inactivation of the healthy hemisphere restores pre-stroke motor patterns in mice
Source: eLife journal article supplement (doi:10.7554/elife.28662), 2017-12-27
Supplement: supp [file elife-28662-supp-v1.zip › elife_poa_e28662_Figure_1_source_data_1.xlsx]

## Sheet: e
Electrode Depth	controls	controls S.E.	Stroke 5days	Stroke 5days S.E.	Stroke 30 days	Stroke 30 days S.E.
1_4	-0.97875	0.10413	-0.16175	0.02421	-0.42036	0.06376
5_8	-1.43895	0.0963	-0.21269	0.04559	-0.62381	0.10206
9_12	-1.36467	0.07722	-0.27857	0.07256	-0.59557	0.09299
13_16	-1.05413	0.12918	-0.31048	0.07791	-0.54048	0.08117

## Sheet: f
Electrode Depth	controls	controls S.E.	Stroke 5days	Stroke 5days S.E.	Stroke 30 days	Stroke 30 days S.E.
1_4	-0.16156	0.12147	0.00588	0.02266	0.16275	0.04809
5_8	-0.22566	0.121	0.02208	0.02719	0.46251	0.07989
9_12	-0.07421	0.08723	0.06261	0.02515	0.61909	0.09052
13_16	0.17394	0.0491	0.1188	0.02623	0.57844	0.0978
