# Supplementary material for: Combining robotic training and inactivation of the healthy hemisphere restores pre-stroke motor patterns in mice
Source: eLife journal article supplement (doi:10.7554/elife.28662), 2017-12-27
Supplement: supp [file elife-28662-supp-v1.zip › elife_poa_e28662_Figure_2_source_data_1.xlsx]

## Sheet: d
recording hemisphere	Sham	Sham S.E.	Stroke	Stroke S.E.
Healthy	-0.96745	0.19586	-0.72078	0.10847
Sham/Stroke	-0.9296	0.16445	-0.24855	0.04565

## Sheet: e
recording hemisphere	Sham	Sham S.E.	Stroke	Stroke S.E.
Healthy	0.02731	0.09078	-0.14496	0.08872
Sham/Stroke	0.12013	0.06887	0.59248	0.09559
