# Supplementary material for: Combining robotic training and inactivation of the healthy hemisphere restores pre-stroke motor patterns in mice
Source: eLife journal article supplement (doi:10.7554/elife.28662), 2017-12-27
Supplement: supp [file elife-28662-supp-v1.zip › elife_poa_e28662_Figure_3_figure_supplement_1_source_data_1.xlsx]

## Sheet: a
Electrode	sham	Sham S.E.	stroke	Stroke S.E.
50	-0.43182	0.09333	-0.40936	0.12447
100	-0.51373	0.14812	-0.47576	0.13895
150	-0.59209	0.1583	-0.5206	0.13624
200	-0.65591	0.16151	-0.59391	0.1301
250	-0.61721	0.12816	-0.6283	0.11129
300	-0.59529	0.11518	-0.67732	0.10511
350	-0.51809	0.10143	-0.68685	0.10176
400	-0.46695	0.09127	-0.67791	0.10858
450	-0.41004	0.08066	-0.64495	0.11264
500	-0.37197	0.06962	-0.61036	0.12126
550	-0.36427	0.07919	-0.58902	0.12688
600	-0.34017	0.07813	-0.55275	0.11585
650	-0.32277	0.06148	-0.48611	0.07331
700	-0.342	0.05962	-0.46841	0.0691
750	-0.37896	0.06647	-0.46419	0.06803
800	-0.39845	0.08301	-0.43413	0.07148
