# Supplementary material for: Combining robotic training and inactivation of the healthy hemisphere restores pre-stroke motor patterns in mice
Source: eLife journal article supplement (doi:10.7554/elife.28662), 2017-12-27
Supplement: supp [file elife-28662-supp-v1.zip › elife_poa_e28662_Figure_3_figure_supplement_2_source_data_1.xlsx]

## Sheet: a
	A2/A1	SE
50	0.56962	0.07059
100	0.801	0.03256
200	0.87347	0.1001
