# Supplementary material for: Combining robotic training and inactivation of the healthy hemisphere restores pre-stroke motor patterns in mice
Source: eLife journal article supplement (doi:10.7554/elife.28662), 2017-12-27
Supplement: supp [file elife-28662-supp-v1.zip › elife_poa_e28662_Figure_3_source_data_1.xlsx]

## Sheet: b
Electrode	Baseline	Baseline S.E.	Post-CGP	Post-CGP S.E.
50	-0.01564	0.05759	-0.08294	0.04776
100	0.01469	0.07029	-0.06118	0.07033
150	0.04205	0.0691	-0.06102	0.06823
200	0.11368	0.07735	-0.02214	0.06433
250	0.17969	0.05888	-0.00844	0.04871
300	0.28873	0.05011	0.07083	0.04379
350	0.33812	0.04535	0.10608	0.0335
400	0.43512	0.03819	0.17047	0.03347
450	0.50838	0.03436	0.21305	0.03667
500	0.53684	0.04258	0.24304	0.04168
550	0.57939	0.04838	0.29188	0.05458
600	0.51058	0.07388	0.29636	0.06257
650	0.54048	0.08545	0.29453	0.07915
700	0.51254	0.09034	0.28536	0.08488
750	0.47914	0.08743	0.28271	0.08673
800	0.41597	0.08922	0.24776	0.08443

## Sheet: d
Electrode	sham	Sham S.E.	stroke	Stroke S.E.
50	0.977641	0.216982	0.606359	0.179841
100	0.854012	0.196681	0.542421	0.190129
150	0.964902	0.202782	0.430475	0.103112
200	0.947555	0.213772	0.306264	0.055387
250	0.941887	0.200486	0.303829	0.0560783
300	0.919365	0.188176	0.296369	0.0572796
350	0.886688	0.16929	0.314335	0.0566481
400	0.819192	0.137803	0.33365	0.0620855
450	0.772094	0.10993	0.353266	0.055031
500	0.732858	0.0929151	0.355466	0.0458892
550	0.709874	0.0817708	0.356046	0.0386747
600	0.688035	0.0732178	0.350539	0.0426231
650	0.581141	0.0716503	0.351429	0.040331
700	0.596707	0.0542479	0.357464	0.0434684
750	0.613451	0.0873886	0.388609	0.0507987
800	0.683012	0.10096	0.401197	0.0608874
