# Supplementary material for: Combining robotic training and inactivation of the healthy hemisphere restores pre-stroke motor patterns in mice
Source: eLife journal article supplement (doi:10.7554/elife.28662), 2017-12-27
Supplement: supp [file elife-28662-supp-v1.zip › elife_poa_e28662_Figure_4_figure_supplement_1_source_data_1.xlsx]

## Sheet: a
	Sham	SE Sham	BoNT	SE BoNT
Baseline	17.6461	2.36541	16.0133	0.94376
2	17.7602	2.06823	23.6748	2.4983
9	18.0252	2.39386	20.6848	1.27154
30	16.2998	1.2806	16.354	1.51756

## Sheet: b
	Sham	SE Sham	BoNT	SE BoNT
Baseline	0	0	0	0
2	1.26273	6.18179	36.2983	9.95946
9	0.81494	11.0732	6.62053	5.12763
30	-5.43056	4.96353	-6.7905	13.6555
