# Supplementary material for: Combining robotic training and inactivation of the healthy hemisphere restores pre-stroke motor patterns in mice
Source: eLife journal article supplement (doi:10.7554/elife.28662), 2017-12-27
Supplement: supp [file elife-28662-supp-v1.zip › elife_poa_e28662_Figure_4_source_data_1.xlsx]

## Sheet: h
Schallert Cylinder test		Stroke Untreated	Error	BoNT	Error
Asymmetry Index (respect to BL)	baseline	0	0	0	0
	2days	62.802	4.34198	36.3992	16.2955
	9days	59.6887	4.46148	45.2915	10.1694
	16days	53.724	2.44337	51.7649	10.6774
	23days	47.2044	5.38885	54.0334	3.71716
	30 days	52.4301	5.01496	54.1844	11.8131
Gridwalk test
Error% contralesional forelimb	baseline	16.6364	2.01207	20.7508	1.52791
	2days	41.6243	1.98742	37.9875	1.61536
	9days	38.8953	2.32031	31.7225	2.5656
	16days	42.566	2.36428	30.9764	1.3947
	23days	42.0878	2.91355	29.8798	2.98921
	30 days	38.041	1.07485	31.9479	2.28323
