# Supplementary material for: Combining robotic training and inactivation of the healthy hemisphere restores pre-stroke motor patterns in mice
Source: eLife journal article supplement (doi:10.7554/elife.28662), 2017-12-27
Supplement: supp [file elife-28662-supp-v1.zip › elife_poa_e28662_Figure_6_figure_supplement_1_source_data_1.xlsx]

## Sheet: a
t-Target
Week 1	Week 2	Week 3	Week 4
18.1231	12.2846	5.0267	5.42
41.3667	8.5538	3.2333	12.4583
12.0733	7.98	8.66	6.6267
15.6308	10.98	18.275	5.5533
5.88	3.8667	4.9933	2.2733
6.7462	7.4167	5.7267	6.72
9.3846	5.6357	6.2143	6.34
6	8.1615	9.62	9.3538
21.76	23.12	15.7467	5.1714
39.6833	4.45	18.9867	27.0929
23.52	1.4	18.3429	8.46
13.95	3.3273	9.89	6.475
8.125	16.7	9.425	10.4545
14.1857	14.12	5.6455	10.5
7.7714	13.02	23.2	5.9182
12.6222	19.3333	26.3444	12
29.4182	25.5	7.2933	5.9786
32.22	33.49	7.9385	18.5571
12.28	13.9571	22.1429	23.2364
	15.8143

## Sheet: b
Attempts
Week 1	Week 2	Week 3	Week 4
16.3846	14.3077	5.2857	6.7
38.8	10.7692	3.4444	13.25
10	6.8	10.5	9.5714
19.4167	7.9	16	6.2857
4.6	6.9091	7.0833	4.25
5.4615	5.3571	5.8571	6.1
7.6923	7.5	6.1667	7.8
6.0769	23.1111	10.2	11.6154
20.6	4.8571	43.0714	6.3636
42.3333	5.3	13.8	28.8571
28.7778	12	18.2727	12.8667
15	13.6	19.0769	9.6364
13.7143	19.1333	8.1429	7.8889
8.8333	7.2222	8	4
16.8889	42	23.5	10.6154
19	45.7	7.5	11.3333
33.8182	22.2857	35.2222	5.8571
50.7	23.3571	9.8333
21.1		12.4167
		28.8571
