# Supplementary material for: Combining robotic training and inactivation of the healthy hemisphere restores pre-stroke motor patterns in mice
Source: eLife journal article supplement (doi:10.7554/elife.28662), 2017-12-27
Supplement: supp [file elife-28662-supp-v1.zip › elife_poa_e28662_Figure_6_source_data_1.xlsx]

## Sheet: a
Gridwalk test		Robot	Robot SE	Robot+BoNT	Robot+BoNT SE
Error% contralesional forelimb	baseline	17.782	2.4023	16.0254	0.98905
	2days	38.9509	3.32024	33.5472	2.20651
	9days	35.6524	3.31033	31.1329	1.99943
	16days	42.9704	3.01137	29.8167	1.63523
	23days	44.307	2.81688	27.1035	1.14054
	30 days	40.2283	2.41473	27.5958	1.35405

## Sheet: b
Schallert Cylinder test		Robot	Robot SE	Robot+BoNT	Robot+BoNT SE
Asymmetry Index (respect to BL)	baseline	0	0	0	0
	2days	52.5283	6.6115	41.2875	6.2751
	9days	60.5961	3.82672	39.6495	5.93626
	16days	58.8462	6.82903	27.1347	3.08521
	23days	51.0277	7.10237	26.9165	4.90093
	30 days	50.5118	8.45656	18.4109	5.77889

## Sheet: c
Gridwalk test		Robot	Robot SE	Robot+BoNT	Robot+BoNT SE
Error% contralesional forelimb	30 Days post lesion	41.1333	2.32171	27.005	2.11271
	40 Days post lesion	39.5524	2.79969	25.3412	1.23086

## Sheet: d
Schallert Cylinder test		Robot	Robot SE	Robot+BoNT	Robot+BoNT SE
Asymmetry Index (respect to BL)	30 Days post lesion	62.1689	12.4626	20.818	4.36497
	40 Days post lesion	55.721	10.8509	16.0213	6.66846
