# Supplementary material for: Combining robotic training and inactivation of the healthy hemisphere restores pre-stroke motor patterns in mice
Source: eLife journal article supplement (doi:10.7554/elife.28662), 2017-12-27
Supplement: supp [file elife-28662-supp-v1.zip › elife_poa_e28662_Figure_7_source_data_1.xlsx]

## Sheet: a
Gridwalk test		Stroke	Stroke S.E.	Robot	Robot S.E.	BoNT	BoNT S.E.	Robot+BoNT	Robot+BoNT S.E.
	30 days post treatment	38.041	1.07485	40.2283	2.41473	31.9479	2.28323	27.5958	1.35405

## Sheet: b
Schallert Cylinder test		Stroke	Stroke S.E.	Robot	Robot S.E.	BoNT	BoNT S.E.	Robot+BoNT	Robot+BoNT S.E.
	30 days post treatment	52.4301	5.01496	38.8548	9.92725	54.1844	11.8131	19.7384	12.0187
