# Supplementary material for: Combining robotic training and inactivation of the healthy hemisphere restores pre-stroke motor patterns in mice
Source: eLife journal article supplement (doi:10.7554/elife.28662), 2017-12-27
Supplement: supp [file elife-28662-supp-v1.zip › elife_poa_e28662_Figure_8_figure_supplement_1_source_data_1.xlsx]

## Sheet: c
	Robot+BoNT	SE Robot+BoNT	BoNT	SE BoNT
Baseline	0	0	0	0
2	30.7667	8.33656	21.1255	5.81129
9	26.0968	7.54818	18.9833	4.93193
16	23.2088	9.57804	10.0334	7.58588
23	14.4289	7.94307	6.23396	7.8791
30	21.5094	7.22445	3.72668	6.96001
