# Supplementary material for: Combining robotic training and inactivation of the healthy hemisphere restores pre-stroke motor patterns in mice
Source: eLife journal article supplement (doi:10.7554/elife.28662), 2017-12-27
Supplement: supp [file elife-28662-supp-v1.zip › elife_poa_e28662_Figure_8_figure_supplement_2_source_data_1.xlsx]

## Sheet: a
	Spontaneous	SE Spontaneous	Robot/BoNT	SE Robot/BoNT
Lesion Volume	1.15088	0.41228	1.40685	0.48507
