# Supplementary material for: Combining robotic training and inactivation of the healthy hemisphere restores pre-stroke motor patterns in mice
Source: eLife journal article supplement (doi:10.7554/elife.28662), 2017-12-27
Supplement: supp [file elife-28662-supp-v1.zip › elife_poa_e28662_Figure_8_source_data_1.xlsx]

## Sheet: b
Spontaneous			Robot+BoNT/E
ArcLen	TREATMENT DAY		ArcLen	TREATMENT DAY
-6.43379	1		3.00891	1
-1.83685	1		3.66186	1
-4.14298	1		2.84322	1
-4.35701	1		-5.0882	1
-3.82846	1		13.0141	1
-10.2594	1		5.42273	1
-5.68555	1		0.986786	1
1.50797	1		-1.70208	1
1.01187	1		16.9009	1
-2.9848	1		4.46234	1
0.503768	1		-7.35388	1
-0.853434	1		0.487379	1
-1.3543	1		9.40476	1
0.644542	1		6.86016	1
4.94831	1		3.06654	1
-2.28723	1		6.48788	1
2.14799	1		-0.984764	1
9.86744	1		4.64609	1
-5.48568	1		-4.08658	1
-1.20163	1		-0.456161	1
-5.06911	1		-3.97863	1
0.0277561	1		13.1668	1
-1.07125	1		1.08167	1
-3.01673	1		17.8124	1
-3.26235	1		-2.63241	1
-0.885938	1		7.54911	1
0.0607418	1		-0.954595	1
2.24771	1		0.67983	1
-0.467119	1		4.84847	1
4.83324	1		1.09709	1
0.90812	1		9.50217	1
3.57174	1		4.8615	1
10.5075	1		9.74693	1
10.1726	1		7.1598	1
-6.58557	1		-3.903	1
-5.47008	1		5.70267	1
14.3629	1		6.33758	1
0.329514	1		-1.66821	1
-8.2916	1		6.69031	1
-2.09694	1		0.80974	1
14.3901	1		12.4562	1
10.9108	1		14.1537	1
-2.24727	1		-0.373391	1
-4.41844	1		1.33911	1
3.3465	1		16.1602	1
2.17709	1		0.301667	1
-2.96499	1		11.7034	1
-1.91967	1		0.0707449	1
9.70916	2		1.51579	1
5.86989	2		3.20864	1
2.32303	2		0.655544	1
14.5414	2		0.981241	1
19.5923	2		0.238868	1
2.76947	2		3.87142	1
-1.79038	2		-10.1295	1
11.4827	2		-8.57387	1
18.9316	2		-10.7674	1
2.20265	3		-12.9883	1
1.17526	3		-4.76165	1
14.415	3		-2.75875	1
-8.15803	3		9.519	1
16.6738	3		9.77389	1
19.5914	3		-4.74204	1
-5.21056	3		-1.37709	1
16.7776	3		-3.8298	1
6.52005	3		-5.16023	1
-3.76306	3		-6.45657	1
8.74056	3		-3.68231	1
7.59248	4		-6.6552	1
17.7199	4		-13.2603	1
0.504215	4		-6.49842	1
-0.114292	4		-8.91579	1
10.2746	4		-11.4141	1
-0.710642	4		-10.8176	1
1.60233	4		-11.6997	1
2.12417	5		-17.5968	1
-0.244893	5		-2.82918	1
-5.79184	5		-3.62518	1
2.71039	5		-13.9862	1
45.2224	5		-6.98867	1
1.97213	5		-4.35974	1
6.09354	5		-5.59287	1
2.76743	5		2.76604	1
-4.91036	6		-14.8095	1
11.8807	6		-10.0666	1
1.34333	6		-8.56403	1
9.89733	6		-0.926003	1
6.36454	6		1.30032	2
11.3564	6		11.7689	2
20.1917	6		1.36846	2
-2.97286	6		14.1622	2
25.7657	6		-4.05432	2
25.5834	6		2.74218	2
-9.75039	6		3.43112	2
16.0602	6		9.86884	2
10.8531	1		-3.15162	2
9.36988	1		35.3184	2
11.3279	1		12.9382	2
7.16088	1		0.752025	2
4.18557	1		8.81686	2
8.90004	1		2.92552	2
5.39275	1		1.01443	2
-0.770974	1		11.2625	2
-2.45987	1		3.81007	2
1.34114	1		9.07851	2
-4.31847	1		4.56349	2
-8.04288	1		-0.840135	3
2.86746	1		10.145	3
10.5923	1		9.46866	3
7.79998	1		9.33457	3
-0.667835	1		13.757	3
13.9239	1		12.3025	3
3.60713	1		5.60146	3
-2.26751	1		12.3093	3
3.94889	1		14.3495	3
2.14239	1		-1.49012	3
19.537	1		12.6314	3
7.23687	1		-3.99205	3
-7.31653	1		-2.91605	3
-12.6829	1		14.2653	3
-2.7268	1		7.73289	3
-8.89939	1		6.51099	4
-6.34864	1		2.59111	4
-11.2423	1		2.07077	4
4.27328	1		16.582	4
-2.48848	1		13.0009	4
0.277274	1		12.6789	4
-5.03231	1		11.2138	4
-8.92793	1		12.1814	4
-14.3208	1		8.82705	4
-9.61308	1		11.1661	4
-6.7772	1		16.2387	4
-6.43553	1		14.9051	4
-3.68733	1		21.9155	4
-5.60184	1		3.55381	4
-4.10916	1		17.9335	4
-2.83072	4		7.20168	4
-3.11146	4		14.0108	4
3.96686	4		23.8296	4
6.17304	4		35.7973	4
5.79567	5		11.563	4
-4.9596	5		9.90925	4
-1.91012	5		8.30319	4
4.1917	5		12.8341	4
-0.324141	6		6.85498	4
8.06306	6		8.9074	4
-3.02185	1		10.2087	4
7.60721	1		4.1278	4
-7.44832	1		-3.3397	4
-4.23522	1		14.3721	4
-0.907024	1		7.49697	5
-1.2667	1		12.5101	5
-3.39344	1		1.57931	5
2.80015	1		1.72483	5
-1.81763	1		18.7932	5
1.83375	1		13.4496	5
8.53802	1		0.20344	5
-0.88596	1		20.9735	5
-8.13935	1		-3.27054	5
2.58773	1		-1.06227	5
12.9946	1		-4.77641	5
-5.93706	1		2.00342	5
-0.233785	1		9.59435	5
0.306277	1		-1.79557	5
-3.43323	1		3.26806	5
-5.02853	1		2.61976	5
3.94213	1		-3.35155	6
4.10236	1		-0.647368	6
1.76691	1		-6.23779	6
-7.31196	1		0.50215	6
-12.703	1		-4.32528	6
-10.8834	1		-6.61571	6
-3.48149	1		-0.449049	6
4.21917	1		3.86306	6
-0.104886	1		1.14292	6
4.48006	1		1.10161	6
-4.47838	1		1.25832	6
0.900042	1		10.5736	6
-4.75832	1		-5.34529	1
8.3785	1		-16.8428	1
10.0586	1		4.06713	1
3.91628	1		-5.06203	1
1.06848	1		-1.7705	1
-1.05284	1		0.57626	1
4.3736	1		-2.76973	1
-2.55007	1		-0.442083	1
-1.98673	1		1.74815	1
3.0735	1		5.4857	1
1.8359	1		9.5464	1
0.862375	1		-0.159281	1
-4.86582	1		-3.32464	1
1.06414	1		-9.07419	1
-2.9646	1		-0.798484	1
2.97857	1		8.94654	1
5.08454	1		-3.27028	1
4.11675	1		-3.73621	1
20.2353	2		-11.9822	1
-0.242317	2		-7.07696	1
25.9473	2		5.45281	1
0.144856	3		-4.05467	1
4.51588	3		2.4131	1
7.10876	4		5.64227	1
3.45143	4		-3.92771	1
22.3831	4		1.19239	1
18.728	4		-7.04982	1
4.94027	5		1.0439	1
5.27197	5		-7.16647	1
10.8227	5		-6.11167	1
9.49606	5		-11.9547	1
9.69582	5		-3.52062	1
12.3649	6		3.73707	1
8.85385	6		1.80713	1
11.2582	6		-8.2292	1
14.2482	6		6.21218	1
10.9742	6		-8.56406	1
5.96665	1		5.10205	1
0.505583	1		3.55232	1
0.299455	1		11.2033	1
-0.808706	1		4.93509	1
7.2725	1		-4.13028	1
-13.3777	1		15.3707	1
33.4089	1		-1.76347	1
3.48	1		-7.13227	1
6.50912	1		1.03822	1
6.665	1		10.9875	1
2.05301	1		-13.9685	1
-1.92666	1		0.0617006	1
-0.812532	1		1.22925	1
-0.434243	1		-5.32641	1
4.37834	1		-16.4184	1
0.0274626	1		5.12666	1
23.8423	1		3.48082	1
25.5685	1		-5.63189	1
-0.684045	1		-3.75938	1
-3.85697	1		6.54557	1
-2.9708	1		-10.2717	1
0.818465	1		-7.84387	1
3.30298	1		3.42807	1
1.23162	1		8.16302	1
-7.16816	1		3.46362	1
-5.80448	1		2.47606	1
-7.15016	1		-0.658809	1
-2.27765	1		10.2197	1
-8.06137	1		11.5315	1
2.56348	1		14.933	1
1.136	1		-1.56024	1
0.774432	1		9.94737	1
0.0123211	1		1.27356	1
-3.79643	1		-0.785347	1
7.17644	1		-1.37195	1
-3.57443	1		0.780379	1
-4.36921	1		20.1357	1
-7.21607	1		-3.25227	2
0.0823825	1		1.57787	2
-4.17651	1		3.90027	2
-4.84994	1		19.1454	2
-0.293277	1		16.6877	2
1.178	1		17.1087	2
-5.88849	1		21.2332	2
6.40905	1		9.23712	2
-3.80207	1		19.4672	2
19.2793	1		2.07019	2
-4.96461	1		12.7481	2
-0.41505	1		5.27154	2
2.32467	1		16.0718	2
-11.182	1		3.2468	3
-3.30897	1		15.04	3
-7.90594	1		15.0662	3
-1.71481	1		2.28067	3
-1.94965	1		-5.62558	3
7.29565	1		18.8277	3
-8.83746	1		14.5515	3
21.518	1		-5.81982	3
-9.91172	1		9.24104	3
-4.88881	1		-5.05684	3
-3.57258	1		-9.14461	3
-9.04999	1		1.36101	3
7.96227	1		0.835939	3
-15.2792	1		26.4058	4
-2.99565	1		25.5636	4
-6.08477	1		2.78232	4
-8.39443	1		1.71074	4
1.81141	1		15.9904	4
0.598845	1		-2.86756	4
6.04927	1		8.05318	4
-7.26081	1		8.18427	4
-12.6646	1		5.95025	4
7.83355	1		6.68228	4
-6.45172	1		19.0148	4
-6.0806	1		5.21761	4
-2.13464	1		12.6222	4
-1.27184	1		5.48687	4
-2.9904	1		6.49302	4
11.9046	1		14.6445	4
2.79573	1		6.02102	4
-1.42521	1		5.21429	4
1.35827	2		6.47281	4
4.9351	2		18.2285	4
18.6166	2		8.43725	4
15.8053	2		13.5477	4
20.186	2		9.52924	4
13.83	2		6.7389	4
6.70826	2		17.8498	4
19.9335	2		3.10039	4
27.6598	2		7.6744	4
-8.3549	2		-0.855624	5
-2.94601	2		-6.01949	5
8.98943	2		-8.21108	5
-3.87399	2		2.47637	5
12.7021	2		-3.82717	5
-1.85462	3		-5.23606	5
6.99365	3		-3.24386	5
-0.166474	3		-3.78176	5
10.2557	3		-2.61113	5
-4.99456	3		3.88802	5
21.407	3		6.6135	5
7.71208	3		-0.502452	5
20.4567	3		-0.18378	5
9.86449	3		-1.12228	5
13.5456	3		6.23763	5
2.06862	3		3.54761	6
10.7902	3		21.5335	6
6.55687	3		0.739155	6
12.1189	4		-6.77841	6
9.75343	4		-8.53078	6
-9.067	4		-11.9232	6
24.5601	4		12.7011	6
4.8804	4		9.47583	6
13.0777	4		1.7953	6
16.47	4		11.458	6
11.2103	4		-1.10094	6
21.858	4		-6.66385	6
25.4102	4		-6.44491	6
13.7512	4		14.7959	6
17.2655	4		3.54627	6
11.0611	4		4.43088	6
13.052	4		-3.93971	6
16.0136	4		21.8539	6
19.53	4		2.76398	6
18.4394	4		7.5127	6
20.6782	4		5.6178	1
17.0991	4		3.45648	1
19.6338	4		-12.3317	1
23.1643	4		12.0447	1
23.3098	4		-6.35397	1
-8.08662	5		-9.29187	1
14.9023	5		-2.60004	1
13.7871	5		-3.64759	1
13.4966	5		2.36888	1
6.9571	5		8.04226	1
22.9502	5		1.20406	1
22.1833	5		2.61868	1
12.8759	5		-7.75575	1
10.6129	5		6.99115	1
10.4742	5		-1.51632	1
10.9635	5		-1.01979	1
11.0967	5		0.928323	1
5.53615	5		-5.85844	1
4.77559	5		-5.75265	1
10.1973	5		-5.74154	1
6.72578	5		-4.79566	1
18.3209	5		3.02059	1
13.422	5		-6.44815	1
13.5412	5		-6.47209	1
8.75415	5		3.66861	1
5.39091	5		8.14667	1
13.7754	5		-2.76763	1
11.4409	5		-9.04824	1
12.3158	5		-2.83673	1
16.7749	6		-3.51409	1
9.03163	6		-1.03561	1
23.5496	6		-6.72651	1
3.07214	6		16.2962	1
9.63627	6		3.14249	1
13.82	6		13.4916	1
12.9573	6		34.7079	1
16.074	6		-11.7096	1
13.5123	6		0.549724	1
9.76466	6		-0.997407	1
15.2917	6		-3.14781	1
16.446	6		-5.26446	1
5.88635	6		7.34834	1
9.92505	6		-7.0107	1
14.8388	6		6.20631	2
17.7152	6		-1.84165	2
13.2989	6		14.0488	2
16.1528	6		17.6096	2
8.23412	6		19.7375	2
15.2689	6		12.5464	2
15.7883	6		-5.93738	2
-4.80204	1		2.28827	2
-1.68098	1		8.33653	3
-6.46232	1		1.97153	3
1.42899	1		9.56719	3
9.13373	1		10.9031	3
-11.5167	1		13.4173	3
-1.98138	1		8.65213	3
-4.48756	1		3.48009	3
1.88288	1		6.49511	3
-5.16743	1		7.92131	3
-3.06382	1		2.002	3
-1.48623	1		-1.95053	3
-2.39653	1		-5.24138	3
6.06906	1		18.9356	3
0.815121	1		-5.29908	3
-5.01167	1		9.40301	4
-2.8935	1		2.54319	4
-0.586387	1		3.69873	4
11.3743	1		-1.0613	4
6.33262	1		-2.9439	4
11.0995	1		14.2711	4
-3.57336	1		3.02831	4
-0.850454	1		6.7528	4
0.170931	1		-0.456349	4
-3.18277	1		3.25736	4
-7.60161	1		-5.67285	5
-3.43655	1		-7.79455	5
3.30421	1		-3.29639	5
4.52444	1		6.20791	5
-0.845066	1		7.19339	5
-0.879706	1		3.41103	5
4.31571	1		11.9683	5
-1.615	1		6.22965	5
-1.15437	1		5.03056	5
1.5086	1		9.94386	5
-4.43635	1		3.71544	5
18.288	1		1.08467	5
-0.92299	1		-3.58925	5
-7.29362	1		-3.025	5
-7.32042	1		-3.30139	5
-3.80593	1		9.71737	5
-4.28511	1		17.9694	6
-0.944753	1		-5.15523	6
5.01131	1		1.7781	6
8.93942	1		9.67235	6
17.3363	1		-3.50852	6
18.4904	1		-7.28261	6
14.4049	1		0.944276	6
12.4616	1		-18.017	6
0.330102	1		8.18313	6
-8.76344	1		-1.95516	6
-0.176872	1		-10.7006	6
-8.34695	1		5.10215	6
-6.40678	1		-3.73559	1
-4.45739	1		-3.88307	1
0.464289	1		-6.87635	1
0.00682492	1		2.07161	1
-2.07556	1		-1.58367	1
0.510221	1		-4.20787	1
-9.01019	1		0.172417	1
7.34913	1		-8.57974	1
5.07224	1		-4.72622	1
-0.984984	1		-3.58433	1
-6.51021	1		21.3465	1
-8.01374	1		0.183537	1
-8.10289	1		-1.40434	1
-3.11648	1		3.33939	1
2.79269	1		-0.459126	1
-1.50384	1		2.46544	1
-4.41581	1		-1.99564	1
-8.6666	1		2.54923	1
9.83249	1		7.80779	1
-5.5365	1		11.2959	1
-13.6735	1		-0.830469	1
-13.3685	1		-3.37706	1
-1.52618	1		7.71726	1
-8.85155	1		5.79557	1
3.9279	1		14.5776	1
-0.763618	1		-14.5465	1
-3.72414	1		-5.27591	1
7.82464	1		11.5001	1
-6.23379	1		-17.3963	1
7.69142	1		-5.9592	1
1.22294	1		-5.14504	1
5.47642	1		6.27333	1
6.74506	1		8.80719	1
-1.32978	1		0.419476	1
-7.56041	1		0.763577	1
-2.32756	1		-12.0839	1
2.7968	1		-8.95851	1
11.7549	1		3.94623	1
1.85864	1		18.8351	1
-5.06407	1		14.4214	1
1.43355	1		0.984826	1
13.3751	1		-8.68064	1
-0.0132009	1		-0.398397	1
1.71329	1		-3.95919	1
8.37601	1		5.75256	1
-5.02089	1		-8.55745	1
-5.17611	1		2.96277	1
4.3283	1		-6.20962	1
6.04582	1		0.310739	1
-2.23456	1		-1.85331	1
-1.18006	1		4.05215	1
-0.490362	2		-7.54395	1
13.4457	2		-3.58414	1
-1.54241	3		-1.71942	1
0.4092	3		-1.95462	1
6.6482	3		-2.90797	1
5.58488	3		-10.8044	1
7.32542	3		-4.90023	1
11.6057	3		-3.40682	1
-7.32287	1		2.50762	1
18.3885	1		-0.395744	1
0.307884	1		20.6254	1
-1.07412	1		17.9368	2
-3.71144	1		2.37973	2
-5.04056	1		16.9457	2
10.1412	1		23.8929	2
-3.05608	1		-3.15529	2
-0.596836	1		-2.42654	2
-7.64305	1		0.0822274	2
-7.62117	1		8.17248	2
-4.86644	1		8.35781	2
-5.84865	1		4.21916	2
-0.134731	1		1.59794	2
-9.15807	1		-1.74635	2
-0.0927177	1		-1.69865	2
-0.688386	1		0.00940529	2
-6.59815	1		5.79825	2
-5.06073	1		7.7836	3
3.50218	1		3.25547	3
-3.88114	1		5.72205	3
-0.329205	1		17.3248	3
1.33746	1		10.8096	3
-3.70552	1		-2.79806	3
-3.68395	1		3.37409	3
-0.497183	1		13.32	3
-1.70849	1		5.93849	3
2.54038	1		10.4786	3
-2.10932	1		4.2266	3
2.12983	1		7.57757	3
-6.86414	1		19.2388	3
-7.90946	1		13.8577	3
14.7896	1		1.37491	4
15.3646	1		13.5121	4
17.2652	1		2.14738	4
17.0517	1		10.9642	4
14.4628	1		14.2432	4
1.71112	1		18.7869	4
-0.604102	1		21.1503	4
2.16976	1		13.0526	4
-4.84315	1		6.24761	4
-12.8176	1		12.0628	4
-4.19223	1		13.2451	4
-2.14858	1		21.3668	4
-1.31376	1		6.91186	4
0.967611	1		7.74198	5
-0.272466	1		5.91886	5
12.049	1		11.6949	5
2.58436	1		14.6154	5
4.18606	1		1.06762	5
-1.81023	1		4.08533	5
2.10124	1		-4.30676	5
2.26575	1		11.3647	5
5.30256	1		15.824	5
5.48911	1		20.7994	5
-6.20815	1		21.3548	5
1.35595	1		6.87788	6
0.292929	1		-0.469304	6
12.6097	1		12.0129	6
-4.42082	1		12.1861	6
-4.14525	1		-9.96469	6
0.744678	1		-1.43159	6
-5.0189	1		13.2466	6
0.584267	1		6.66631	6
4.10547	1		3.32307	6
-4.29575	1		17.18	6
-2.43586	1		11.435	6
-1.16026	1		5.23548	6
1.9836	1		9.55214	6
-6.35862	1		15.0658	6
-1.80813	1		6.09012	6
-5.97239	1		-2.14187	1
-0.0867935	1		-8.96846	1
0.323121	1		-8.79454	1
-7.83809	1		-5.94866	1
8.58786	1		-4.73049	1
-15.3769	1		-1.74961	1
-1.76661	1		-6.67856	1
-6.73228	1		-5.49102	1
-5.08871	1		-3.54618	1
-9.50204	1		-9.45117	1
-4.01324	1		-2.76641	1
1.24679	1		-1.15407	1
-7.20681	1		-6.09164	1
-4.39586	1		-5.81918	1
3.6277	1		15.8916	1
-7.41673	1		-3.12638	1
-1.08194	1		10.69	1
10.0179	1		-0.926599	1
-6.66275	1		-6.33027	1
12.2364	1		-3.62817	1
10.6882	1		-11.7576	1
-7.83496	1		4.55595	1
4.85317	1		-5.71013	1
3.4482	1		12.5252	1
-15.6803	1		-1.95396	1
22.1476	1		6.76643	1
15.7307	1		-4.11521	1
12.8916	1		3.44899	1
12.3881	1		-13.0635	1
8.30391	1		8.12033	1
-5.73266	1		-8.3966	1
0.876089	1		2.62934	1
-0.200945	1		0.955584	1
-7.27741	1		12.1389	1
-10.7314	1		1.24507	1
-1.15509	1		-4.25327	1
-3.92494	1		5.29151	1
-1.53211	1		3.19948	1
-4.88468	1		3.95798	1
-8.56551	2		12.1751	1
-8.36951	2		12.7893	1
0.525807	3		6.1046	1
3.01103	3		8.53219	1
-5.59109	3		1.19129	1
11.6165	4		-1.51841	1
3.73981	4		1.98429	1
17.2821	4		3.91885	1
1.87755	4		6.80884	2
14.0622	4		9.41001	2
8.87725	4		14.4363	2
17.5924	5		-9.52165	2
13.7008	5		19.3373	2
6.21361	5		19.4967	2
19.1388	5		19.0166	2
-8.64168	5		5.81798	3
7.41025	5		-2.42622	3
7.35041	5		-6.54335	3
15.1706	5		-4.36444	3
2.29908	5		0.175318	3
-1.97105	5		9.82306	3
-10.5267	5		13.0582	3
15.2575	5		8.49752	3
6.39512	5		9.9204	3
-11.2967	6		0.927546	3
15.0461	6		6.96712	3
-10.3702	6		-7.02973	4
-2.38925	6		-0.558677	4
-9.72107	6		-0.0663134	4
-0.968579	6		-9.60652	4
8.89815	6		-3.81544	4
15.1802	6		7.4922	5
-6.96419	6		-9.30944	5
-7.5107	6		-3.60536	5
2.87643	6		-3.81481	6
5.03251	1		-3.27743	6
-7.35935	1		4.70562	6
3.92898	1		4.99195	6
-4.92425	1		-1.62499	6
7.69528	1		8.96475	6
-8.11741	1		12.1101	6
10.6748	1
-10.7145	1
-3.99017	1
7.82572	1
-8.55199	1
8.31699	1
-4.48185	1
-4.45074	1
-11.7674	1
9.53301	1
-7.26854	1
10.0845	1
-7.83293	1
-12.7979	1
1.07794	1
3.58272	1
7.35341	1
-3.32499	1
0.978045	1
-1.5014	1
-5.19567	1
-5.93388	1
-11.1591	1
-6.22262	1
-7.64201	1
-3.64832	1
-11.3965	1
6.54249	1
-14.5628	1
-4.51004	1
-3.26567	1
8.19933	1
-5.87527	1
4.90107	1
6.21967	1
3.40502	1
-11.7822	1
-6.58078	1
-1.44432	1
-10.1071	1
15.2462	1
-8.91073	1
-2.32702	1
-2.10363	1
-3.64549	1
-0.528916	1
10.1819	1
1.56206	1
6.51545	1
10.5846	1
9.66394	1
-9.10998	1
-4.51087	1
5.42247	1
18.2868	1
12.9232	1
-7.50498	1
-3.22799	1
3.11234	1
7.42264	1
18.7	1
11.3604	1
-11.3184	1
1.61571	1
9.74437	1
3.28579	1
-6.08585	1
-1.63202	1
4.68104	1
-1.22548	1
12.1914	1
6.26664	1
0.425178	1
16.6838	1
-3.58724	1
6.75825	1
-7.73272	1
-5.41654	1
-8.76379	1
-3.94456	1
15.3297	2
-2.3485	2
5.68063	2
22.1654	2
9.46368	2
14.4194	2
15.6469	2
15.3544	2
-3.13499	2
20.0181	2
-7.53867	2
6.75968	2
-6.47142	2
-4.47015	2
4.695	2
5.8921	2
1.81157	2
0.738396	2
-4.08269	3
16.0006	3
13.029	3
5.2975	3
12.3273	3
17.7713	3
-11.6118	3
-8.54506	3
-7.02475	3
-1.94015	3
-10.105	3
18.4425	3
11.9828	3
9.70672	3
1.21658	3
-5.05712	3
12.8148	3
3.91167	4
17.4249	4
18.8107	4
22.9171	4
25.3787	4
13.4289	4
19.3494	4
18.0784	4
0.661602	4
29.2272	4
6.66819	4
8.86042	4
3.46516	4
14.32	4
10.0423	4
-6.06516	4
1.16745	4
-1.96107	4
6.94303	4
0.142875	4
-0.0490641	4
-3.45052	4
4.00558	4
-3.43774	4
16.2396	4
11.2264	4
3.64743	4
17.3845	5
16.8359	5
10.3728	5
10.1472	5
21.7406	5
20.7424	5
7.89297	5
4.89903	5
11.926	5
10.9189	5
13.1562	5
0.935527	5
10.3866	5
15.0965	5
27.2961	5
3.78058	5
14.5522	5
0.84383	5
4.62814	5
8.53196	5
12.1855	5
5.43645	5
10.2565	5
9.57646	6
10.4902	6
10.8835	6
12.0978	6
-3.88642	6
-7.42254	6
0.680364	6
22.8291	6
24.8145	6
6.87294	6
16.8781	6
17.3653	6
12.6497	6
10.3398	6

## Sheet: c
Spontaneous			Robot+BoNT/E
AUC	TREATMENT DAY		AUC	TREATMENT DAY
-0.28399	1		25.1877	1
3.75429	1		11.538	1
-3.23496	1		-7.39923	1
-3.28985	1		9.84854	1
4.12414	1		-7.90517	1
-4.57506	1		-2.93311	1
-0.85034	1		5.8157	1
2.80044	1		-2.04621	1
-2.90133	1		9.61414	1
-3.78956	1		-5.93275	1
2.12063	1		11.2026	1
-2.19349	1		-3.07399	1
-0.194855	1		13.4201	1
1.94057	1		1.9528	1
-2.15844	1		-4.15889	1
-4.2042	1		1.11626	1
0.757185	1		-9.36508	1
-3.7243	1		1.27492	1
-4.31858	1		-0.0548369	1
-0.39975	1		1.24902	1
-6.02758	1		5.59989	1
-5.3669	1		-8.85662	1
0.54565	1		-5.48527	1
-2.31864	1		-1.71475	1
2.7627	1		14.4956	1
-7.67376	1		-6.94411	1
12.2732	1		-1.50333	1
-2.29734	1		-8.87442	1
-1.56275	1		3.44868	1
-3.16174	1		-2.59445	1
-3.84109	1		-2.30668	1
7.22962	1		-10.0817	1
12.4206	1		0.165429	1
4.84311	1		-6.21898	1
3.34888	1		-6.14963	1
3.81662	1		8.46748	1
0.0583918	1		-2.35349	1
-1.62316	1		3.70292	1
3.23217	1		1.10762	1
-8.62427	1		-1.87675	1
3.51448	1		1.41759	1
3.26498	1		1.13971	1
-5.37908	1		3.4495	1
3.62968	1		5.52942	1
12.9885	1		3.75229	1
-0.141867	1		-2.27757	1
-3.4199	1		5.21978	1
-1.86906	1		1.83325	1
33.3199	2		4.36687	1
30.3034	2		15.4183	1
18.2117	2		10.2608	1
21.2098	2		2.20475	1
36.6686	2		4.47664	1
16.9622	2		7.74486	1
24.9244	2		-5.51713	1
39.144	2		-8.32879	1
48.9195	2		-1.20937	1
36.5612	3		1.98215	1
33.9517	3		1.78721	1
56.402	3		2.25621	1
28.6535	3		-5.80826	1
32.6	3		-5.72633	1
30.9521	3		0.72007	1
27.8502	3		-3.38472	1
22.8483	3		-0.407896	1
32.5016	3		-7.85035	1
43.4339	3		-4.35333	1
24.268	3		-2.60654	1
40.8874	4		1.10349	1
59.1865	4		-5.88096	1
41.3269	4		-3.86714	1
27.6124	4		-8.22492	1
63.86	4		1.879	1
22.1614	4		-1.85482	1
45.5461	4		-1.30443	1
15.2978	5		-2.85284	1
8.01285	5		0.484711	1
9.55992	5		-6.4162	1
18.4965	5		-3.37148	1
25.1391	5		-3.70122	1
21.7485	5		6.96602	1
13.5326	5		-3.86324	1
11.1464	5		-2.87972	1
10.1798	6		-6.3519	1
17.6199	6		-0.0616724	1
15.1889	6		-5.04209	1
14.9186	6		-2.22758	1
29.8681	6		61.0102	2
37.8964	6		48.6142	2
36.4519	6		23.0664	2
19.0353	6		19.7354	2
48.0876	6		17.7416	2
17.2082	6		22.3865	2
8.11391	6		40.0456	2
44.4079	6		31.1618	2
12.4329	1		39.1291	2
-7.10325	1		12.5542	2
-14.7193	1		18.8057	2
10.4654	1		8.64532	2
-11.6127	1		20.4416	2
-9.55444	1		20.6106	2
-9.27983	1		48.8435	2
15.1943	1		27.5575	2
-16.3025	1		21.7422	2
7.16187	1		28.6127	2
3.22106	1		16.0643	2
-12.9185	1		57.6632	3
-11.1465	1		35.3989	3
13.7466	1		43.4353	3
7.15093	1		53.759	3
-1.5738	1		27.0623	3
-10.5941	1		23.2928	3
3.7498	1		21.7055	3
2.32244	1		39.9577	3
13.0991	1		54.0823	3
22.1011	1		28.9425	3
32.1706	1		23.0445	3
3.8864	1		16.9246	3
-6.64998	1		18.3605	3
-12.6704	1		33.4326	3
-9.01099	1		21.6676	3
0.699878	1		17.1175	4
-14.0862	1		0.591789	4
5.7474	1		12.0495	4
-7.98577	1		-8.0766	4
-8.11927	1		18.7412	4
0.907019	1		20.3496	4
10.1967	1		11.6582	4
12.8512	1		9.16674	4
-4.79594	1		16.1558	4
1.29306	1		3.18171	4
7.05943	1		23.7507	4
-11.7409	1		15.1039	4
1.25221	1		23.9398	4
8.35195	1		34.8812	4
-15.197	1		22.9076	4
12.6355	4		20.401	4
37.3314	4		9.40738	4
31.4361	4		31.5248	4
16.9776	4		19.2173	4
17.2931	5		42.4124	4
10.7321	5		31.0312	4
34.9728	5		28.5295	4
23.1649	5		17.7485	4
12.3808	6		13.1779	4
44.8016	6		5.84546	4
-5.09756	1		17.4746	4
6.53831	1		14.5578	4
2.61525	1		0.459483	4
6.5747	1		21.8416	4
-6.86465	1		22.1594	5
-2.32852	1		16.0993	5
-0.416127	1		8.75951	5
2.97141	1		15.8258	5
-0.625	1		9.51174	5
-9.73625	1		25.5388	5
-2.63164	1		13.2253	5
1.8728	1		8.94846	5
-9.70987	1		21.5949	5
-8.48263	1		15.8396	5
-7.47412	1		5.61539	5
-5.01543	1		10.5836	5
6.71025	1		-3.61662	5
-3.87306	1		6.96865	5
7.32546	1		3.24854	5
15.4324	1		11.2133	5
0.290495	1		5.53556	6
6.89143	1		1.63962	6
-0.504024	1		12.8315	6
-1.69397	1		-1.56127	6
6.86764	1		4.73929	6
-7.97494	1		2.6487	6
3.57353	1		-0.358786	6
-4.1784	1		17.2916	6
8.66022	1		0.258334	6
5.10895	1		25.9586	6
2.35525	1		4.68634	6
10.7433	1		5.55851	6
-4.56936	1		6.78508	1
-1.2506	1		-5.44285	1
-5.48361	1		-0.448201	1
17.6495	1		-2.53691	1
-8.64327	1		0.520985	1
7.18652	1		0.850622	1
-7.01946	1		7.34663	1
-8.15056	1		-4.50715	1
11.2268	1		1.79869	1
-2.41231	1		-0.605232	1
2.1833	1		7.57882	1
-5.3264	1		-0.75822	1
-4.07522	1		-2.64912	1
-7.02591	1		7.43789	1
-1.69986	1		2.46857	1
4.893	1		2.28914	1
0.0320441	1		-0.864752	1
-5.4398	1		1.13505	1
31.8849	2		-2.09639	1
51.5427	2		-0.368051	1
22.6811	2		2.66369	1
31.4905	3		3.04185	1
46.3875	3		4.77453	1
27.4672	4		9.85815	1
25.5678	4		-1.07252	1
23.5757	4		-2.18412	1
58.5329	4		-3.85971	1
25.1524	5		-7.48474	1
18.0323	5		-4.8767	1
39.1147	5		-5.5243	1
21.2794	5		0.464832	1
21.2216	5		-2.57494	1
21.3391	6		-3.81005	1
29.541	6		0.110752	1
23.729	6		5.86551	1
22.2091	6		0.904193	1
19.457	6		-3.39248	1
11.7942	1		-1.72594	1
12.496	1		-4.79009	1
-3.77899	1		14.2851	1
-4.62976	1		10.4642	1
-6.21468	1		-3.38947	1
1.74704	1		2.8325	1
15.1804	1		1.65561	1
-5.85838	1		-0.301784	1
-3.81515	1		8.90384	1
-8.10327	1		3.49005	1
5.16419	1		-5.19708	1
-4.17661	1		-2.28662	1
7.21756	1		-4.04609	1
-7.57795	1		-6.9224	1
2.29712	1		-5.54307	1
-10.4306	1		4.19386	1
-9.89345	1		-1.84274	1
1.06593	1		4.81199	1
3.43776	1		-6.21715	1
-2.34961	1		-5.16933	1
0.858534	1		-3.34378	1
11.2373	1		1.3796	1
-7.8992	1		-1.91232	1
-9.98995	1		-2.15743	1
-3.43735	1		-7.4173	1
-11.4782	1		-2.42041	1
-3.36569	1		-2.25772	1
-4.2831	1		3.56298	1
-5.08303	1		-2.17081	1
-8.43436	1		2.49757	1
-3.37881	1		2.00629	1
5.11899	1		5.46616	1
-11.5402	1		-1.51354	1
-15.3175	1		-3.83256	1
-3.67591	1		-3.64399	1
6.13718	1		1.82377	1
6.02592	1		-0.110495	1
5.04855	1		28.0829	2
8.35713	1		35.2587	2
0.075074	1		28.0775	2
5.22904	1		28.3839	2
7.73003	1		34.3501	2
9.06733	1		45.5949	2
-3.46791	1		26.4956	2
8.39842	1		54.7413	2
2.07567	1		40.1147	2
10.2996	1		27.6374	2
-2.13638	1		51.6491	2
8.55053	1		24.1707	2
-7.94749	1		32.444	2
-6.98162	1		44.0396	3
1.7402	1		6.29095	3
-0.614363	1		25.305	3
19.3386	1		21.4069	3
4.39511	1		27.8259	3
-7.1076	1		35.2623	3
-4.72856	1		17.4079	3
27.2795	1		10.9038	3
17.8657	1		16.1908	3
-8.93973	1		8.61892	3
2.88717	1		19.7496	3
3.05262	1		20.3709	3
-3.30251	1		22.7471	3
-7.60135	1		30.7194	4
-11.8372	1		13.5474	4
0.286604	1		24.6846	4
8.75566	1		12.656	4
-3.48848	1		5.86743	4
-11.8726	1		2.65364	4
-8.10909	1		6.26564	4
-0.019289	1		5.75664	4
-4.59089	1		0.321793	4
14.0532	1		15.0488	4
-4.49139	1		15.8528	4
1.59542	1		0.688037	4
9.26431	1		3.37859	4
-0.421361	1		13.5651	4
-12.2918	1		-3.79798	4
-3.39558	1		20.3704	4
-0.0919981	1		20.018	4
3.02547	1		4.02162	4
35.9473	2		12.3644	4
15.416	2		7.28796	4
30.8821	2		18.3569	4
28.0389	2		19.3817	4
25.4658	2		10.761	4
10.9417	2		12.1318	4
16.4525	2		9.57004	4
18.2426	2		-0.115953	4
41.0743	2		21.7627	4
16.5234	2		24.8027	5
22.0988	2		15.23	5
35.3383	2		32.4469	5
30.836	2		28.1835	5
22.3088	2		19.1574	5
9.49152	3		11.2648	5
12.9621	3		19.4565	5
21.4514	3		7.50094	5
7.93172	3		9.74098	5
-0.877722	3		19.7064	5
5.57998	3		23.0494	5
3.25069	3		27.544	5
0.191916	3		10.1555	5
16.8015	3		20.0282	5
22.3338	3		27.8622	5
17.297	3		4.97474	6
28.7696	3		4.22537	6
17.6857	3		3.80664	6
8.17017	4		-2.52943	6
6.64921	4		-4.22944	6
9.96277	4		-2.02604	6
11.7607	4		4.0558	6
21.0349	4		7.51716	6
9.64	4		1.64385	6
12.9421	4		-1.47955	6
4.89028	4		-0.84972	6
23.3757	4		7.4413	6
14.1803	4		5.63277	6
9.62764	4		4.34217	6
16.5243	4		12.7603	6
3.71178	4		4.55508	6
3.85535	4		5.64278	6
8.49776	4		4.93286	6
19.1043	4		23.475	6
21.0728	4		12.1785	6
16.8326	4		3.53956	1
-6.51036	4		-6.78175	1
12.5537	4		-6.49558	1
5.46356	4		-8.21022	1
8.79154	4		-4.81198	1
25.2906	5		-8.61172	1
21.2308	5		-3.19682	1
6.95853	5		-5.2177	1
23.0021	5		25.8252	1
19.1118	5		-4.14036	1
23.3036	5		-6.90831	1
9.39962	5		19.9714	1
14.4036	5		-6.93433	1
11.8807	5		12.1024	1
19.4777	5		25.5251	1
19.2624	5		-6.48549	1
9.71075	5		11.3822	1
10.2717	5		-2.97205	1
7.99195	5		-6.97632	1
8.86571	5		-3.65917	1
6.44534	5		-9.16294	1
9.63887	5		-6.79119	1
14.9067	5		-7.13244	1
1.28793	5		-8.81956	1
7.70726	5		-5.34001	1
8.5169	5		-9.48239	1
-0.81424	5		1.41193	1
4.75342	5		0.248208	1
18.3855	5		2.57164	1
4.10085	6		-2.09863	1
13.4273	6		1.62525	1
0.447355	6		-8.95476	1
13.0518	6		19.9401	1
10.5051	6		-5.60516	1
17.1576	6		-4.80487	1
18.979	6		-3.35167	1
18.0248	6		-7.51439	1
9.87213	6		-0.41202	1
0.288102	6		22.7787	1
7.02583	6		-3.38719	1
2.17604	6		-1.1988	1
-3.33887	6		-2.80113	1
9.07229	6		21.3374	1
-3.38119	6		20.8615	2
15.4008	6		1.69334	2
5.24938	6		7.99254	2
10.7343	6		12.2109	2
10.2703	6		12.3228	2
2.0027	6		10.4923	2
-0.723997	6		1.69375	2
2.79313	1		12.1925	2
-2.99468	1		4.32841	3
2.32577	1		24.2492	3
3.77929	1		3.01287	3
-8.01089	1		0.782073	3
-2.47512	1		-3.70339	3
-7.7135	1		7.24973	3
2.85214	1		-4.34846	3
12.9812	1		0.0435886	3
-0.5592	1		18.2314	3
-7.67799	1		2.78884	3
-7.73277	1		7.6713	3
-10.9426	1		4.70229	3
-12.1384	1		9.02563	3
-7.20322	1		4.98765	3
0.372689	1		5.86675	4
-9.16708	1		6.18693	4
-1.22077	1		4.78938	4
-0.838235	1		-2.17084	4
-8.82903	1		1.53763	4
-6.33601	1		6.81923	4
-9.0359	1		5.63762	4
-5.63442	1		0.74711	4
-6.22956	1		6.86874	4
-2.3789	1		5.97753	4
-11.1181	1		9.59979	5
3.55699	1		-1.50031	5
3.88313	1		2.22816	5
-4.34736	1		-5.42206	5
15.5631	1		6.02309	5
-0.281584	1		2.85359	5
-2.24102	1		-0.256996	5
-2.27448	1		12.1118	5
8.50282	1		0.547998	5
13.5588	1		24.9767	5
0.295066	1		5.62091	5
-0.439071	1		7.16247	5
9.21744	1		7.78936	5
-7.57113	1		10.6897	5
5.98037	1		-1.79231	5
-0.614476	1		9.18586	5
-7.63002	1		7.40451	6
8.11805	1		4.24816	6
-5.39793	1		-8.61818	6
-3.17407	1		-3.79897	6
3.86696	1		3.59548	6
-7.82714	1		0.30507	6
4.95858	1		2.14013	6
7.46512	1		2.6051	6
-4.53968	1		2.7661	6
-2.36684	1		7.92668	6
-10.2272	1		5.60969	6
-1.6568	1		8.41599	6
-8.74361	1		-9.46947	1
3.23213	1		-6.90322	1
-5.70942	1		-12.0235	1
-3.29935	1		-7.8659	1
-1.38425	1		5.57332	1
-0.189997	1		-3.00715	1
-11.4258	1		-6.98803	1
-1.34467	1		-11.7768	1
0.986527	1		-0.574725	1
-9.49889	1		19.3401	1
-8.0698	1		2.92191	1
-0.0999647	1		11.3001	1
-4.86903	1		6.46631	1
-0.533792	1		20.8391	1
5.39344	1		13.5493	1
0.016221	1		18.8871	1
3.01968	1		0.153605	1
-6.11015	1		13.8029	1
15.6988	1		6.85583	1
13.9114	1		1.38414	1
2.96244	1		-1.13419	1
0.176502	1		-4.87627	1
-10.5831	1		-3.39065	1
-10.3952	1		12.6953	1
52.1562	1		8.93492	1
13.2503	1		-11.5655	1
14.6273	1		1.95117	1
2.36736	1		8.09306	1
-2.69222	1		-7.58151	1
14.0599	1		-5.54747	1
4.48723	1		-0.50779	1
-1.36635	1		-5.81833	1
-7.49938	1		-3.15966	1
15.5274	1		-12.1595	1
-3.80778	1		0.571104	1
11.3028	1		-13.6622	1
6.54617	1		1.69165	1
17.902	1		12.3077	1
-3.94112	1		2.95853	1
3.28467	1		-14.1618	1
0.0141258	1		-3.25118	1
6.93584	1		4.73876	1
-2.02718	1		-7.51283	1
-1.19897	1		-4.04316	1
4.74246	1		-1.44465	1
-2.2609	1		-0.871199	1
-7.72115	1		0.712881	1
-10.1239	1		-5.57721	1
-3.00067	1		1.13744	1
0.141925	1		-2.33636	1
-6.09146	1		-4.46767	1
30.4104	2		-3.25605	1
30.0559	2		0.36874	1
26.664	3		-0.922221	1
15.291	3		2.25769	1
55.0634	3		-6.08232	1
12.6418	3		-3.32518	1
40.7723	3		-4.44967	1
29.5451	3		-1.58904	1
-12.691	1		-8.45981	1
33.811	1		4.51689	1
18.4056	1		15.7526	1
9.99756	1		25.8814	2
6.04849	1		11.5463	2
10.1486	1		12.0126	2
10.6502	1		13.1887	2
-7.79571	1		10.4759	2
8.34721	1		5.04446	2
-16.3362	1		11.7559	2
-8.27134	1		2.04452	2
5.68685	1		14.7193	2
-2.45558	1		9.7554	2
-0.824141	1		9.4207	2
-2.55395	1		9.61157	2
-6.83498	1		8.38664	2
10.6263	1		17.2463	2
-7.88865	1		5.78043	2
-12.558	1		0.178244	3
-14.3708	1		17.3383	3
2.5452	1		15.4834	3
-20.2338	1		12.7267	3
-3.7439	1		9.92973	3
-3.24285	1		-0.41098	3
-5.40359	1		14.3825	3
-10.1897	1		1.80339	3
-10.52	1		0.829923	3
5.5755	1		5.42519	3
2.13478	1		-7.987	3
-8.72366	1		8.35981	3
-16.8861	1		-4.57987	3
-25.9487	1		9.19442	3
-14.4383	1		23.9488	4
-6.70729	1		15.8086	4
1.96634	1		27.0497	4
7.74522	1		15.33	4
14.2572	1		6.43899	4
6.20639	1		12.7964	4
9.93553	1		26.1886	4
12.7681	1		15.1624	4
-8.68135	1		7.37737	4
8.85819	1		-3.32501	4
3.28711	1		11.7384	4
14.4672	1		38.6392	4
4.04907	1		4.94783	4
9.52771	1		12.4857	5
-18.388	1		1.10159	5
12.746	1		-0.750656	5
-0.0670234	1		4.72297	5
16.3156	1		2.73059	5
5.31259	1		7.1366	5
15.8029	1		6.13795	5
7.61338	1		14.4103	5
8.07173	1		22.4119	5
3.89776	1		11.5278	5
-3.92374	1		-9.26557	5
5.06819	1		4.84787	6
-5.4826	1		-10.5633	6
-4.59947	1		9.33688	6
14.2179	1		6.93334	6
-12.1824	1		3.43958	6
6.52268	1		-0.446459	6
-7.49064	1		3.16404	6
7.67952	1		-1.83848	6
-1.56451	1		6.72527	6
-10.3757	1		-3.1897	6
6.50651	1		-5.56435	6
-6.34548	1		6.08657	6
9.40342	1		-0.570854	6
-6.12493	1		-2.55879	6
-3.16325	1		1.84488	6
-20.439	1		-10.7684	1
-10.5502	1		-6.23458	1
-6.52162	1		-6.84553	1
-0.747179	1		-5.95014	1
-16.083	1		-0.429101	1
4.75389	1		7.38614	1
17.1259	1		5.98709	1
-5.04701	1		-2.79249	1
11.553	1		-5.42222	1
-4.89912	1		-6.99626	1
-11.3486	1		-5.32154	1
2.3042	1		-7.35653	1
-6.19279	1		-7.62866	1
11.244	1		-8.34502	1
-0.395417	1		22.1687	1
2.25104	1		-5.74855	1
-8.58887	1		-0.537414	1
-3.6351	1		-8.52284	1
-0.677808	1		6.53708	1
-14.2544	1		-12.1406	1
-13.5226	1		-8.94147	1
8.07239	1		-8.17734	1
-3.05739	1		-4.42865	1
-1.27355	1		10.5271	1
-9.05943	1		-3.44648	1
12.3063	1		9.01806	1
13.9899	1		-2.70341	1
6.23723	1		3.74764	1
-9.31586	1		-10.3844	1
0.24245	1		-2.2204	1
0.441348	1		-4.72863	1
17.9881	1		-7.15953	1
-2.74131	1		-3.80219	1
-1.08643	1		4.11215	1
-12.7135	1		-8.67425	1
-3.0378	1		-1.90181	1
25.8617	1		11.8375	1
2.50357	1		19.8716	1
-0.883155	1		4.4442	1
12.3442	2		24.8813	1
18.3821	2		12.2261	1
21.1836	3		11.634	1
7.56951	3		12.946	1
11.6917	3		-3.19966	1
62.6119	4		-2.94128	1
4.49345	4		2.24917	1
21.3727	4		4.17555	1
12.0465	4		1.54683	2
22.4989	4		-1.6586	2
23.3008	4		8.24108	2
26.6573	5		-1.05807	2
4.71044	5		-9.60487	2
5.6439	5		12.4324	2
19.4169	5		10.2932	2
17.4347	5		5.65463	3
14.4547	5		-7.78051	3
12.7254	5		-5.889	3
19.6536	5		9.14634	3
17.3252	5		20.0393	3
12.607	5		26.1215	3
3.70716	5		8.09385	3
9.56602	5		8.56434	3
6.48289	5		-1.09496	3
-1.00806	6		7.77234	3
16.5546	6		10.9765	3
5.11349	6		-3.6357	4
22.819	6		13.2141	4
5.57933	6		6.93262	4
-11.4291	6		2.39659	4
12.594	6		6.81009	4
20.6237	6		-2.1747	5
-2.575	6		-5.75113	5
-4.23867	6		2.46203	5
-3.22043	6		-2.60565	6
2.13583	1		-1.8908	6
-8.92864	1		-3.68546	6
-9.07873	1		2.3071	6
1.71493	1		-5.05512	6
-3.88458	1		-5.41266	6
15.3245	1		-1.15591	6
5.28176	1
3.06345	1
-3.40227	1
-7.98263	1
-5.74432	1
3.46756	1
-7.51103	1
-0.430138	1
-4.58313	1
-5.97869	1
-2.70782	1
-4.4183	1
-6.05496	1
-2.16618	1
-7.38794	1
3.08598	1
11.3958	1
5.81336	1
6.70378	1
10.5487	1
-3.27201	1
-1.19298	1
-8.61946	1
-0.18439	1
-0.208321	1
0.18956	1
10.8862	1
-9.85746	1
-7.60739	1
-3.39224	1
6.18945	1
26.1798	1
-0.230917	1
-7.03079	1
-4.7956	1
-7.62118	1
0.561241	1
0.838377	1
-2.73915	1
-10.5658	1
-6.8323	1
-4.81818	1
16.1801	1
-4.22881	1
-2.03464	1
-3.98293	1
7.44777	1
-8.92261	1
-2.39433	1
7.90619	1
-11.8981	1
-11.272	1
-1.47355	1
-8.06265	1
1.95329	1
-0.364716	1
6.24223	1
14.3195	1
5.13953	1
6.44166	1
5.23657	1
-7.19279	1
-1.71615	1
-3.17868	1
-1.93452	1
-7.69494	1
14.9549	1
-0.0391933	1
-6.59499	1
0.549331	1
12.1593	1
6.32474	1
4.69487	1
3.05392	1
6.26944	1
5.83364	1
8.09901	1
0.688033	1
-1.18468	1
-3.47635	1
28.0815	2
13.9656	2
23.2636	2
22.714	2
14.4769	2
11.3663	2
22.4005	2
0.0235322	2
39.1069	2
9.35531	2
18.9078	2
5.60613	2
7.57563	2
15.126	2
2.60656	2
3.7912	2
6.82819	2
-0.822906	2
23.1208	3
19.6246	3
22.4432	3
32.168	3
13.6969	3
43.0747	3
20.5017	3
24.2347	3
13.0066	3
3.97064	3
2.92196	3
25.979	3
16.0361	3
22.1481	3
48.7774	3
12.5436	3
23.8519	3
34.1168	4
21.7995	4
31.2379	4
53.3496	4
34.3926	4
39.2707	4
12.8917	4
59.2284	4
22.4876	4
28.9109	4
23.4441	4
39.2853	4
2.49345	4
12.599	4
24.4843	4
17.9482	4
27.3077	4
22.5218	4
21.0016	4
12.626	4
16.2919	4
24.2123	4
37.9585	4
33.0304	4
7.38815	4
18.6688	4
14.536	4
18.1369	5
10.6917	5
11.424	5
24.6652	5
12.3537	5
33.8047	5
12.6759	5
21.1487	5
10.5296	5
15.4169	5
7.38462	5
7.49428	5
11.9412	5
-2.14611	5
8.35986	5
9.70599	5
13.7136	5
27.0218	5
29.6677	5
9.22248	5
7.79285	5
8.28474	5
13.5606	5
37.8691	6
25.4865	6
26.9836	6
19.8731	6
32.6078	6
23.977	6
19.9114	6
24.2313	6
49.4066	6
27.2843	6
4.06202	6
47.5373	6
19.091	6
29.5953	6

## Sheet: e
Spontaneous			Robot+BoNT/E
Speed	TREATMENT DAY		Speed	TREATMENT DAY
-13.8571	1		-24.2022	1
-11.6995	1		-21.5048	1
-11.1337	1		-21.2964	1
-10.0549	1		-19.9018	1
-9.71082	1		-19.1733	1
-9.54377	1		-17.553	1
-9.17124	1		-17.4773	1
-7.51042	1		-17.2422	1
-6.96693	1		-16.8043	1
-6.7217	1		-16.3601	1
-6.41088	1		-16.0768	1
-6.11433	1		-16.0483	1
-5.82468	1		-14.7393	1
-5.22387	1		-14.6632	1
-5.07019	1		-14.5677	1
-4.75805	1		-13.7875	1
-2.62923	1		-11.9641	1
-1.89896	1		-11.6878	1
-1.70199	1		-11.4491	1
-1.48391	1		-11.273	1
-0.295071	1		-10.9888	1
0.0890326	1		-10.2571	1
0.64016	1		-9.84018	1
0.702692	1		-9.73067	1
1.76685	1		-9.61987	1
2.08155	1		-8.75405	1
2.28235	1		-8.50919	1
3.64293	1		-7.99521	1
4.83364	1		-7.30827	1
4.86854	1		-6.13071	1
5.10603	1		-5.91861	1
6.98386	1		-5.32849	1
7.31955	1		-5.06715	1
7.62439	1		-4.63925	1
7.74394	1		-4.15221	1
8.64163	1		-4.15181	1
10.3792	1		-4.07011	1
11.1278	1		-2.68659	1
11.8425	1		-2.15074	1
12.5713	1		-1.95829	1
12.9396	1		-0.572187	1
14.5937	1		-0.309043	1
-32.215	2		0.220625	1
-35.9786	2		1.51749	1
-36.8969	2		1.61669	1
-30.0978	2		2.40942	1
-28.0284	2		3.23489	1
-29.0786	2		3.24523	1
-10.7133	2		3.24828	1
-30.1853	2		3.40016	1
-20.8873	2		3.45068	1
-32.3212	3		3.90214	1
-36.937	3		4.11991	1
-27.3848	3		4.49966	1
-11.6265	3		7.38967	1
-26.3102	3		7.46126	1
-25.1898	3		7.56045	1
-19.8064	3		7.68185	1
-29.0357	3		8.36729	1
-20.7166	3		8.46383	1
-15.7245	3		9.07424	1
-25.0879	3		10.0509	1
-21.9653	4		10.3978	1
-28.7959	4		10.5709	1
-39.2207	4		11.6473	1
-38.0117	4		12.7245	1
-11.5181	4		14.546	1
-24.5814	4		14.6379	1
-18.054	4		15.1287	1
-17.8043	5		15.2053	1
-38.3569	5		16.907	1
-0.732902	5		18.5776	1
-38.0391	5		19.1227	1
-35.8197	5		19.14	1
-37.5935	5		19.2193	1
-21.0388	5		20.63	1
-37.156	5		21.1633	1
-30.2918	6		21.934	1
-22.459	6		22.6963	1
-38.7004	6		23.4397	1
-33.0878	6		24.1819	1
-33.8199	6		25.1256	1
-32.4019	6		-12.2513	2
-7.25474	6		-20.1191	2
-20.9623	6		-26.8411	2
-23.135	6		-7.17874	2
-15.814	6		-27.8224	2
-10.7259	6		-23.5015	2
-28.4593	6		-25.1259	2
-22.6883	1		-21.9996	2
-21.6432	1		3.68678	2
-21.2203	1		-13.9572	2
-20.0507	1		-22.8004	2
-17.7091	1		-26.2733	2
-16.2585	1		-21.6863	2
-15.2799	1		-25.2779	2
-14.8894	1		-23.4119	2
-14.2678	1		-20.8144	2
-14.0994	1		-25.5649	2
-10.6683	1		-22.2873	2
-9.55652	1		-25.0457	2
-9.05736	1		-28.946	3
-8.23385	1		-22.2168	3
-6.59639	1		-22.5904	3
-3.09288	1		-19.9448	3
-1.29297	1		-18.8008	3
-0.0210185	1		-20.638	3
1.95425	1		-24.8602	3
2.79693	1		-21.2716	3
2.80517	1		-17.957	3
3.40998	1		-9.09101	3
3.63249	1		-24.1508	3
4.45713	1		-12.8942	3
5.57409	1		-5.80788	3
5.94551	1		-18.3111	3
6.63939	1		-23.0312	3
6.8503	1		-10.118	4
6.95225	1		-21.4612	4
10.3145	1		-25.4857	4
11.0236	1		-18.7096	4
12.8487	1		-20.2473	4
13.618	1		-10.8276	4
15.2006	1		-21.5584	4
15.3538	1		-17.9603	4
15.635	1		-6.1666	4
17.7728	1		-20.7611	4
19.4947	1		-5.13459	4
19.616	1		-19.4066	4
24.7306	1		-17.0573	4
-19.8078	4		11.2788	4
-21.1534	4		-17.7717	4
-18.9365	4		9.70164	4
-19.4681	4		-5.3772	4
-17.3152	5		-14.3069	4
11.7472	5		-8.79059	4
23.2065	5		33.2856	4
-15.0757	5		12.4954	4
-10.7231	6		13.8445	4
7.74771	6		-20.6208	4
-17.107	1		-1.85573	4
-16.3874	1		0.0814301	4
-15.523	1		-4.19696	4
-15.465	1		4.73638	4
-13.0538	1		-1.40978	4
-11.1905	1		-19.2183	4
-10.9443	1		-22.5197	5
-9.43388	1		-20.3803	5
-8.64299	1		-9.66701	5
-7.76635	1		10.2713	5
-6.83885	1		-16.2206	5
-5.95884	1		-19.5171	5
-5.80694	1		-3.40749	5
-5.48438	1		-15.6151	5
-5.28309	1		11.3	5
-3.19511	1		-7.60297	5
-2.76819	1		1.06433	5
-2.67847	1		2.09983	5
-2.45984	1		-21.2106	5
-1.48315	1		9.39305	5
-1.46911	1		17.0344	5
-1.43657	1		9.17043	5
1.36189	1		8.61993	6
1.74469	1		7.68676	6
1.91315	1		1.92512	6
1.96154	1		21.0467	6
2.04694	1		12.0126	6
3.04142	1		-11.763	6
4.3043	1		10.4514	6
4.75001	1		9.05917	6
5.52458	1		11.8888	6
5.70529	1		0.69142	6
6.34611	1		13.6998	6
6.55386	1		23.4819	6
6.86321	1		-19.0456	1
7.08944	1		-18.6602	1
8.66111	1		-15.5561	1
9.51757	1		-15.2663	1
10.3141	1		-15.2518	1
10.5333	1		-14.3998	1
10.7822	1		-12.4612	1
12.1618	1		-11.7948	1
13.734	1		-11.1951	1
16.7244	1		-10.534	1
18.7419	1		-10.4563	1
-21.2227	2		-9.96115	1
-12.1821	2		-9.76168	1
-26.5646	2		-9.71541	1
-4.01931	3		-8.87732	1
-0.678407	3		-8.37987	1
1.84561	4		-7.63972	1
-10.2522	4		-7.60999	1
-33.1848	4		-7.11184	1
-33.819	4		-5.99197	1
-0.181215	5		-5.31362	1
5.11509	5		-4.93281	1
8.32334	5		-4.75657	1
9.4951	5		-4.65704	1
17.0154	5		-3.98915	1
-9.31314	6		-3.90211	1
-4.00428	6		-2.16982	1
4.88735	6		-1.0739	1
-28.4559	6		-1.0307	1
-1.62204	6		-0.423989	1
-16.2644	1		-0.264922	1
-15.3958	1		0.0415442	1
-14.4481	1		0.069378	1
-11.3871	1		0.316587	1
-11.2263	1		1.04365	1
-10.6808	1		1.33578	1
-10.6719	1		1.5212	1
-10.0865	1		1.87792	1
-9.85748	1		2.00868	1
-9.75631	1		2.59932	1
-9.60649	1		2.66868	1
-9.49714	1		3.27721	1
-9.01848	1		3.68087	1
-8.87633	1		4.48249	1
-8.13051	1		5.57161	1
-8.00481	1		6.32443	1
-7.94208	1		6.99963	1
-7.18612	1		8.17161	1
-5.2758	1		10.1135	1
-4.53414	1		10.9986	1
-3.78202	1		11.4458	1
-3.15688	1		11.5705	1
-2.73355	1		12.3205	1
-2.61773	1		13.6541	1
-2.49589	1		14.5918	1
-2.29239	1		16.2223	1
-1.78172	1		16.5886	1
-1.77449	1		16.8647	1
0.0554917	1		17.2678	1
0.179477	1		18.2697	1
0.417322	1		19.3108	1
1.44159	1		20.9755	1
1.68654	1		-44.8458	2
1.74746	1		-41.3875	2
1.79913	1		-13.0579	2
3.08864	1		-31.9677	2
3.24509	1		-32.4962	2
3.33827	1		-34.6454	2
3.59671	1		-29.734	2
3.67801	1		2.81345	2
4.03327	1		-34.1755	2
5.02548	1		-8.49413	2
5.05615	1		-24.0077	2
5.77277	1		2.84837	2
6.42471	1		-13.9347	2
6.56159	1		-6.64103	3
8.03062	1		-31.6096	3
8.95236	1		-33.1134	3
9.14494	1		-14.2597	3
9.17511	1		-13.2828	3
9.243	1		-30.6319	3
9.36163	1		-26.1752	3
9.41205	1		-25.9522	3
10.0324	1		-36.9992	3
10.4492	1		-4.95333	3
12.5434	1		-10.135	3
13.5327	1		-4.41353	3
15.3897	1		-10.6256	3
15.6681	1		11.0754	4
20.3984	1		-9.35431	4
-45.7271	2		-2.55397	4
-43.5399	2		0.329528	4
-35.9259	2		-33.1677	4
-37.6054	2		-1.54161	4
-34.7522	2		-1.00723	4
-38.6427	2		-16.098	4
-42.8086	2		-4.74714	4
-34.9731	2		-7.40568	4
-23.4911	2		-1.03105	4
-27.0663	2		10.4222	4
-21.3627	2		-36.3349	4
-41.2536	2		-39.5179	4
-15.8862	2		-6.65439	4
-39.2729	2		3.61936	4
-0.952122	3		13.9444	4
-27.9265	3		1.10847	4
-12.7681	3		10.2851	4
-10.3691	3		3.54284	4
6.79648	3		-3.69535	4
-17.4472	3		10.2332	4
-20.1888	3		16.2795	4
-35.4273	3		6.17661	4
-19.9099	3		-7.0074	4
-13.2615	3		6.91868	4
-26.5736	3		15.2326	4
-10.4018	3		-8.7404	5
0.708575	3		-10.2107	5
-24.7189	4		-3.00283	5
-13.858	4		-1.6977	5
-16.5661	4		0.284822	5
-13.0511	4		6.08357	5
-43.8415	4		5.51013	5
-21.1769	4		-5.24486	5
-10.7831	4		6.32409	5
-13.9072	4		-7.1064	5
-15.0637	4		-27.346	5
-17.3293	4		2.2084	5
-10.6728	4		10.0076	5
-9.59069	4		-7.45211	5
-20.7896	4		3.12252	5
-17.7751	4		-19.1603	6
-16.6559	4		-32.019	6
-10.3252	4		8.72991	6
-37.0548	4		-8.88417	6
13.1511	4		-8.39742	6
-11.5207	4		-5.10238	6
2.57926	4		-4.22685	6
-13.3233	4		-3.6728	6
0.113788	4		16.92	6
-8.78253	5		12.1214	6
-12.6626	5		-23.6808	6
-20.1338	5		-3.77459	6
-18.0617	5		-3.05415	6
-6.85982	5		-15.5433	6
-27.4509	5		4.16142	6
-5.13051	5		17.4999	6
-2.11389	5		0.197514	6
-2.88457	5		-0.0429691	6
-12.613	5		4.78617	6
10.1544	5		2.22183	6
-0.964329	5		-25.2369	1
-7.82626	5		-21.4356	1
-4.33631	5		-20.5079	1
-7.92681	5		-19.3122	1
-5.58801	5		-17.9089	1
2.00536	5		-15.8299	1
-2.38467	5		-14.4073	1
2.93918	5		-13.2062	1
-15.8499	5		-10.2116	1
-8.01134	5		-8.21265	1
-0.364894	5		-7.1664	1
3.93074	5		-7.05997	1
1.99317	5		-4.72997	1
-16.4113	6		-4.61122	1
9.78674	6		-2.71445	1
-14.1658	6		-2.62674	1
-22.1305	6		-2.30989	1
-6.26059	6		-2.23267	1
-5.19331	6		-2.04663	1
-11.155	6		-2.0398	1
1.0926	6		-1.02054	1
-8.06907	6		-0.319508	1
-12.731	6		-0.218899	1
-11.5321	6		0.92597	1
-15.5959	6		0.927887	1
-13.5848	6		3.1286	1
8.84872	6		3.50312	1
-10.8681	6		4.96041	1
-18.7106	6		5.1698	1
-12.2355	6		9.94774	1
13.3713	6		11.8981	1
-5.03231	6		12.6742	1
-21.0822	6		12.9728	1
0.846186	6		14.5428	1
-17.1298	1		17.3302	1
-15.2139	1		19.0792	1
-14.826	1		19.3497	1
-13.9664	1		21.0266	1
-13.4949	1		23.4183	1
-13.3893	1		24.5104	1
-12.8896	1		-21.8367	2
-12.7769	1		-28.1319	2
-12.3756	1		-19.6634	2
-11.7718	1		-16.375	2
-11.5804	1		-15.1991	2
-10.9143	1		-19.3513	2
-10.8069	1		-29.1046	2
-10.7994	1		-21.7664	2
-10.7946	1		-21.7301	3
-10.2246	1		-23.9925	3
-8.92121	1		-21.612	3
-8.75357	1		-20.5697	3
-8.19451	1		-18.5508	3
-6.74078	1		-6.5871	3
-6.46561	1		-3.04905	3
-6.38777	1		1.36872	3
-5.43334	1		1.12708	3
-4.57372	1		5.66775	3
-3.93512	1		0.0816864	3
-3.67134	1		-3.57839	3
-3.31111	1		-19.5126	3
-3.14444	1		2.30089	3
-2.71639	1		-21.2949	4
-2.59391	1		-3.61507	4
-2.44621	1		-1.03396	4
-2.03718	1		-7.69758	4
-1.85944	1		1.38355	4
-1.83857	1		-19.942	4
-1.69295	1		-2.04514	4
-1.51025	1		-1.35301	4
-1.38517	1		2.47527	4
-1.10346	1		4.24601	4
-0.365941	1		7.99626	5
-0.0776144	1		4.07712	5
-0.0509954	1		19.5186	5
1.26223	1		-2.16446	5
1.27747	1		33.1331	5
1.67559	1		-1.74318	5
1.73115	1		15.2157	5
1.85363	1		2.80273	5
1.92802	1		8.6079	5
2.12611	1		15.3221	5
2.98142	1		5.53262	5
3.69652	1		2.40236	5
4.11343	1		-1.05637	5
4.19192	1		2.44994	5
4.48093	1		-1.08758	5
4.49146	1		-19.303	5
4.86458	1		-5.74533	6
5.24445	1		-10.2557	6
5.88939	1		3.16235	6
6.44888	1		13.6184	6
6.72902	1		-3.18638	6
7.39008	1		4.14265	6
7.58165	1		7.02933	6
7.66323	1		-5.4641	6
7.71199	1		-21.9958	6
7.93914	1		7.18363	6
7.97998	1		-11.7479	6
8.58156	1		5.77974	6
8.78132	1		-29.2825	1
9.49888	1		-28.9654	1
9.64638	1		-28.8691	1
10.1626	1		-28.2052	1
10.3389	1		-26.4885	1
11.9731	1		-23.1745	1
12.6214	1		-21.1703	1
12.9456	1		-19.86	1
13.2154	1		-19.2522	1
13.4405	1		-18.8744	1
13.6468	1		-16.481	1
14.199	1		-16.1014	1
15.1412	1		-12.865	1
16.7201	1		-12.7394	1
-7.2616	2		-11.0812	1
-28.1928	2		-8.85794	1
-37.9287	3		-8.73161	1
-35.9222	3		-8.71176	1
-32.0789	3		-8.32571	1
-33.6689	3		-6.76366	1
-33.1779	3		-6.50343	1
-31.1749	3		-6.40298	1
-33.4269	1		-6.25945	1
-33.384	1		-4.95077	1
-32.5543	1		-3.51064	1
-32.2956	1		-2.48679	1
-30.9589	1		-2.40931	1
-30.1615	1		-1.27204	1
-29.7347	1		0.766664	1
-28.3292	1		0.908057	1
-28.3085	1		1.45863	1
-27.6634	1		2.53469	1
-27.6499	1		3.23633	1
-27.361	1		3.28091	1
-27.1935	1		3.39642	1
-26.9477	1		3.95859	1
-26.8901	1		5.57346	1
-26.1336	1		6.33005	1
-26.1177	1		6.86141	1
-25.7423	1		7.41524	1
-24.5093	1		8.98576	1
-24.3748	1		10.1674	1
-23.6062	1		11.3605	1
-23.6039	1		11.5301	1
-22.8754	1		11.6646	1
-22.0301	1		13.0415	1
-12.5081	1		13.5237	1
-11.1462	1		13.557	1
-9.67059	1		14.6097	1
-7.99034	1		15.0653	1
-7.68245	1		15.3778	1
-7.51321	1		15.9752	1
-7.08996	1		16.8689	1
-6.41694	1		16.8773	1
-6.26309	1		17.4153	1
-5.47886	1		18.6725	1
-4.68544	1		18.9561	1
-4.15082	1		19.3043	1
-3.74951	1		25.5062	1
-3.59077	1		26.8268	1
-2.88411	1		27.59	1
-2.71041	1		-15.5746	2
-2.05872	1		-29.7394	2
-1.6168	1		-4.92604	2
-1.15107	1		-20.6245	2
-0.507407	1		-6.20277	2
0.994361	1		1.94715	2
1.43426	1		19.4257	2
1.47359	1		7.02404	2
1.58105	1		-26.18	2
1.77341	1		26.9662	2
1.89563	1		22.4242	2
2.08731	1		5.29806	2
2.51569	1		23.29	2
3.29056	1		12.3465	2
3.94872	1		20.9179	2
4.55624	1		16.8262	3
4.66988	1		9.83427	3
4.86557	1		22.1248	3
5.21467	1		14.724	3
5.5074	1		21.956	3
5.83676	1		11.6938	3
6.3153	1		12.372	3
7.34426	1		-8.36961	3
7.69103	1		-9.09244	3
9.04068	1		9.13343	3
9.20972	1		11.6137	3
9.3129	1		-7.65559	3
9.51145	1		15.9796	3
9.64661	1		8.10161	3
9.74275	1		17.8998	4
9.84148	1		11.732	4
10.1651	1		10.4359	4
10.7001	1		12.647	4
11.0791	1		20.1239	4
11.2713	1		2.16903	4
11.5183	1		-20.3811	4
11.7664	1		-9.38198	4
12.0961	1		9.25489	4
12.321	1		7.27086	4
12.8552	1		-15.6346	4
12.9595	1		-20.6421	4
13.2115	1		-6.68888	4
13.6604	1		-11.3422	5
14.0054	1		3.91176	5
14.8202	1		-4.16185	5
15.2397	1		0.59163	5
15.2502	1		3.93219	5
15.8825	1		7.92987	5
15.9101	1		-2.21424	5
16.2446	1		38.584	5
17.5333	1		28.7572	5
18.3497	1		5.31856	5
18.5956	1		7.23749	5
18.8103	1		-9.51637	6
18.9943	1		-26.2432	6
19.048	1		12.9928	6
20.5428	1		-0.322833	6
20.768	1		8.84234	6
20.798	1		-23.0113	6
20.9589	1		-2.4617	6
21.3142	1		-10.4488	6
21.7194	1		23.1812	6
21.8088	1		-0.879098	6
22.877	1		11.6766	6
23.3325	1		34.0661	6
24.4452	1		26.4065	6
24.9174	1		8.02753	6
25.646	1		2.3489	6
-39.551	2		-16.2584	1
-40.8052	2		-16.1513	1
-34.8456	3		-15.2073	1
-34.2832	3		-14.192	1
-39.7259	3		-13.8943	1
7.08921	4		-12.7533	1
-17.0216	4		-12.0928	1
-25.9905	4		-11.2171	1
-7.57923	4		-9.47671	1
-21.0776	4		-8.58395	1
2.80123	4		-6.67556	1
-24.8836	5		-6.38566	1
-27.38	5		-5.09048	1
-18.6751	5		-4.3145	1
-22.9213	5		-3.93092	1
-6.33173	5		-3.63676	1
-26.346	5		-1.86037	1
-5.35463	5		-1.75429	1
-8.89268	5		-1.51956	1
-34.2448	5		-1.23117	1
-1.92737	5		-0.921066	1
-7.43629	5		1.20927	1
-20.5796	5		2.88099	1
-29.0092	5		3.18887	1
-14.6593	6		4.17071	1
-13.4699	6		4.49926	1
-40.0145	6		5.35739	1
-4.06837	6		7.27052	1
-5.65583	6		7.48804	1
-19.4047	6		7.63462	1
-16.7082	6		8.73219	1
-26.4131	6		9.51867	1
-38.1934	6		10.3891	1
-37.3353	6		14.0932	1
-13.5435	6		14.3046	1
-21.603	1		14.3415	1
-20.4148	1		15.4144	1
-20.2386	1		17.2427	1
-19.4397	1		19.4114	1
-18.6406	1		-32.2547	2
-18.5678	1		-29.77	2
-18.4686	1		-26.2296	2
-18.4341	1		-24.7367	2
-18.0355	1		-25.0275	2
-17.927	1		-25.6256	2
-17.5485	1		-25.8929	2
-17.3383	1		-8.56499	3
-16.9434	1		-2.26807	3
-16.7395	1		-15.9834	3
-16.6904	1		6.00972	3
-16.6151	1		7.51391	3
-16.5942	1		5.43609	3
-16.5359	1		1.36471	3
-16.0082	1		13.9515	3
-15.9367	1		-13.612	3
-15.5209	1		-4.41479	3
-15.3199	1		10.5926	3
-15.1322	1		-19.3624	4
-14.6547	1		-19.2863	4
-14.6456	1		-2.92274	4
-14.5829	1		-12.5846	4
-14.4616	1		-27.2638	4
-14.3839	1		-11.046	5
-13.4483	1		-4.51414	5
-11.5968	1		9.88132	5
-10.9184	1		-8.04655	6
-10.6625	1		-10.1609	6
-10.1045	1		11.7848	6
-9.72659	1		-11.2954	6
-9.3803	1		2.70004	6
-7.99171	1		5.76366	6
-6.21708	1		2.7289	6
-3.41302	1
-2.54461	1
-1.99027	1
0.239072	1
0.299735	1
0.617089	1
1.61068	1
2.57239	1
4.99329	1
5.14702	1
5.62086	1
6.14911	1
7.0869	1
7.63344	1
8.2891	1
8.55797	1
9.3116	1
10.2677	1
10.4483	1
10.8313	1
11.0346	1
11.9005	1
12.0788	1
12.2469	1
12.3601	1
12.8361	1
13.3405	1
13.4543	1
15.4721	1
16.2362	1
17.7071	1
18.7781	1
20.0958	1
20.1959	1
20.2693	1
20.5934	1
20.6072	1
20.6118	1
20.6544	1
20.7261	1
22.2051	1
22.6566	1
23.1884	1
23.4338	1
24.2772	1
28.78	1
-10.7579	2
13.3232	2
-1.04209	2
-7.42206	2
-8.26767	2
-12.7738	2
-8.43814	2
-4.84868	2
21.8543	2
-12.6086	2
21.2222	2
-7.38312	2
8.25195	2
26.2412	2
24.7876	2
23.2262	2
36.5936	2
32.534	2
27.6768	3
5.78871	3
-14.514	3
-4.40797	3
-14.4194	3
-9.61068	3
13.8001	3
14.6913	3
16.2687	3
25.0575	3
12.2496	3
-8.77773	3
-14.3062	3
29.034	3
26.6949	3
23.9748	3
-13.3043	3
24.4217	4
23.7917	4
32.7847	4
-5.40295	4
-6.00736	4
-12.8483	4
-9.48955	4
-11.7382	4
36.628	4
-4.59298	4
3.78815	4
45.8619	4
29.0813	4
-13.8926	4
-17.294	4
24.6405	4
12.8296	4
29.8801	4
20.1943	4
4.85856	4
35.0019	4
5.29526	4
46.2654	4
26.909	4
-13.0177	4
13.1121	4
30.3905	4
-10.3157	5
-10.5858	5
-13.5058	5
20.116	5
-5.08697	5
-8.26214	5
-16.852	5
39.4322	5
-13.9126	5
-14.9453	5
10.7416	5
33.306	5
-15.0412	5
-11.8895	5
-1.6691	5
19.5596	5
-12.0635	5
31.5895	5
39.5411	5
-15.7648	5
11.8596	5
1.03266	5
12.1001	5
58.6895	6
-15.0119	6
-14.0968	6
-13.3667	6
13.746	6
25.662	6
16.6663	6
-8.03925	6
-6.54466	6
-16.7421	6
-11.4961	6
-10.7827	6
-14.2775	6
5.98334	6

## Sheet: f
Spontaneous			Robot+BoNT/E
Smoothness	TREATMENT DAY		Smoothness	TREATMENT DAY
-0.897436	1		-1.62338	1
-0.897436	1		-1.62338	1
-0.897436	1		-1.62338	1
-0.897436	1		-1.62338	1
-0.897436	1		-1.62338	1
-0.897436	1		-1.62338	1
-0.897436	1		-1.62338	1
-0.897436	1		-0.623377	1
-0.897436	1		-0.623377	1
-0.897436	1		-0.623377	1
-0.897436	1		-0.623377	1
0.102564	1		-0.623377	1
0.102564	1		-0.623377	1
0.102564	1		-0.623377	1
0.102564	1		-0.623377	1
0.102564	1		-0.623377	1
0.102564	1		-0.623377	1
0.102564	1		-0.623377	1
0.102564	1		-0.623377	1
0.102564	1		-0.623377	1
0.102564	1		-0.623377	1
0.102564	1		-0.623377	1
0.102564	1		-0.623377	1
0.102564	1		-0.623377	1
0.102564	1		-0.623377	1
0.102564	1		-0.623377	1
0.102564	1		-0.623377	1
0.102564	1		-0.623377	1
0.102564	1		-0.623377	1
0.102564	1		-0.623377	1
0.102564	1		-0.623377	1
0.102564	1		-0.623377	1
1.10256	1		-0.623377	1
1.10256	1		-0.623377	1
1.10256	1		-0.623377	1
1.10256	1		-0.623377	1
1.10256	1		0.376623	1
1.10256	1		0.376623	1
1.10256	1		0.376623	1
5.10256	2		0.376623	1
5.10256	2		0.376623	1
0.102564	2		0.376623	1
6.10256	2		0.376623	1
7.10256	2		0.376623	1
1.10256	2		0.376623	1
1.10256	2		0.376623	1
3.10256	2		0.376623	1
3.10256	2		0.376623	1
3.10256	3		0.376623	1
3.10256	3		0.376623	1
3.10256	3		0.376623	1
-1.89744	3		0.376623	1
3.10256	3		0.376623	1
4.10256	3		0.376623	1
0.102564	3		0.376623	1
-0.897436	3		0.376623	1
1.10256	3		0.376623	1
-0.897436	3		0.376623	1
3.10256	3		0.376623	1
2.10256	4		0.376623	1
5.10256	4		0.376623	1
0.102564	4		0.376623	1
0.102564	4		0.376623	1
1.10256	4		1.37662	1
3.10256	4		1.37662	1
1.10256	4		1.37662	1
1.10256	5		1.37662	1
0.102564	5		1.37662	1
1.10256	5		1.37662	1
1.10256	5		1.37662	1
6.10256	5		1.37662	1
2.10256	5		1.37662	1
2.10256	5		1.37662	1
1.10256	5		1.37662	1
0.102564	6		1.37662	1
1.10256	6		1.37662	1
2.10256	6		1.37662	1
4.10256	6		1.37662	2
0.102564	6		0.376623	2
4.10256	6		1.37662	2
-0.897436	6		1.37662	2
2.10256	6		3.37662	2
-0.897436	6		0.376623	2
5.10256	6		3.37662	2
0.102564	6		2.37662	2
-1.89744	6		0.376623	2
-2.37838	1		5.37662	2
-2.37838	1		2.37662	2
-2.37838	1		-0.623377	2
-2.37838	1		3.37662	2
-2.37838	1		1.37662	2
-1.37838	1		1.37662	2
-1.37838	1		2.37662	2
-1.37838	1		0.376623	2
-1.37838	1		1.37662	2
-0.378378	1		1.37662	2
-0.378378	1		0.376623	3
-0.378378	1		2.37662	3
-0.378378	1		-2.62338	3
-0.378378	1		4.37662	3
-0.378378	1		1.37662	3
-0.378378	1		3.37662	3
-0.378378	1		5.37662	3
-0.378378	1		5.37662	3
0.621622	1		0.376623	3
0.621622	1		1.37662	3
0.621622	1		2.37662	3
0.621622	1		0.376623	3
0.621622	1		0.376623	3
0.621622	1		4.37662	3
0.621622	1		0.376623	3
0.621622	1		2.37662	4
0.621622	1		3.37662	4
0.621622	1		0.376623	4
0.621622	1		3.37662	4
0.621622	1		-0.623377	4
1.62162	1		4.37662	4
1.62162	1		2.37662	4
1.62162	1		3.37662	4
1.62162	1		1.37662	4
1.62162	1		1.37662	4
2.62162	1		4.37662	4
2.62162	1		1.37662	4
5.62162	4		4.37662	4
3.62162	4		-0.623377	4
0.621622	4		0.376623	4
-0.378378	4		1.37662	4
-1.37838	5		6.37662	4
-1.37838	5		8.37662	4
-1.37838	5		5.37662	4
-0.378378	5		-0.623377	4
1.62162	6		-0.623377	4
1.62162	6		0.376623	4
-0.95122	1		2.37662	4
-0.95122	1		4.37662	4
-0.95122	1		1.37662	4
-0.95122	1		1.37662	4
-0.95122	1		-0.623377	4
-0.95122	1		-0.623377	4
-0.95122	1		2.37662	4
-0.95122	1		0.376623	5
-0.95122	1		3.37662	5
-0.95122	1		-0.623377	5
0.0487805	1		0.376623	5
0.0487805	1		3.37662	5
0.0487805	1		2.37662	5
0.0487805	1		2.37662	5
0.0487805	1		5.37662	5
0.0487805	1		-1.62338	5
0.0487805	1		0.376623	5
0.0487805	1		1.37662	5
0.0487805	1		1.37662	5
0.0487805	1		2.37662	5
0.0487805	1		0.376623	5
0.0487805	1		0.376623	5
0.0487805	1		0.376623	5
0.0487805	1		3.37662	6
0.0487805	1		-0.623377	6
0.0487805	1		-0.623377	6
0.0487805	1		-0.623377	6
0.0487805	1		0.376623	6
0.0487805	1		-0.623377	6
0.0487805	1		1.37662	6
0.0487805	1		1.37662	6
0.0487805	1		-0.623377	6
0.0487805	1		1.37662	6
1.04878	1		-0.623377	6
1.04878	1		0.376623	6
1.04878	1		-1.08475	1
1.04878	1		-1.08475	1
1.04878	1		-1.08475	1
1.04878	1		-1.08475	1
1.04878	1		-1.08475	1
1.04878	1		-1.08475	1
3.04878	2		-1.08475	1
2.04878	2		-1.08475	1
10.0488	2		-1.08475	1
0.0487805	3		-1.08475	1
1.04878	3		-1.08475	1
1.04878	4		-0.0847458	1
0.0487805	4		-0.0847458	1
6.04878	4		-0.0847458	1
3.04878	4		-0.0847458	1
1.04878	5		-0.0847458	1
0.0487805	5		-0.0847458	1
0.0487805	5		-0.0847458	1
1.04878	5		-0.0847458	1
-0.95122	5		-0.0847458	1
-0.95122	6		-0.0847458	1
1.04878	6		-0.0847458	1
1.04878	6		-0.0847458	1
6.04878	6		-0.0847458	1
1.04878	6		-0.0847458	1
-1.33333	1		-0.0847458	1
-1.33333	1		-0.0847458	1
-1.33333	1		-0.0847458	1
-1.33333	1		-0.0847458	1
-1.33333	1		-0.0847458	1
-1.33333	1		-0.0847458	1
-1.33333	1		-0.0847458	1
-1.33333	1		-0.0847458	1
-1.33333	1		-0.0847458	1
-1.33333	1		-0.0847458	1
-1.33333	1		-0.0847458	1
-1.33333	1		-0.0847458	1
-1.33333	1		-0.0847458	1
-1.33333	1		-0.0847458	1
-0.333333	1		-0.0847458	1
-0.333333	1		-0.0847458	1
-0.333333	1		-0.0847458	1
-0.333333	1		-0.0847458	1
-0.333333	1		0.915254	1
-0.333333	1		0.915254	1
-0.333333	1		0.915254	1
-0.333333	1		0.915254	1
-0.333333	1		0.915254	1
-0.333333	1		0.915254	1
-0.333333	1		0.915254	1
-0.333333	1		0.915254	1
-0.333333	1		0.915254	1
-0.333333	1		0.915254	1
-0.333333	1		0.915254	1
-0.333333	1		0.915254	1
-0.333333	1		0.915254	1
-0.333333	1		0.915254	1
-0.333333	1		0.915254	1
-0.333333	1		0.915254	1
-0.333333	1		3.91525	2
-0.333333	1		3.91525	2
-0.333333	1		1.91525	2
-0.333333	1		2.91525	2
-0.333333	1		2.91525	2
-0.333333	1		5.91525	2
-0.333333	1		4.91525	2
-0.333333	1		0.915254	2
0.666667	1		2.91525	2
0.666667	1		3.91525	2
0.666667	1		3.91525	2
0.666667	1		1.91525	2
0.666667	1		3.91525	2
0.666667	1		2.91525	3
0.666667	1		6.91525	3
0.666667	1		3.91525	3
0.666667	1		3.91525	3
0.666667	1		0.915254	3
0.666667	1		4.91525	3
0.666667	1		3.91525	3
0.666667	1		0.915254	3
0.666667	1		2.91525	3
0.666667	1		-0.0847458	3
0.666667	1		-1.08475	3
0.666667	1		-0.0847458	3
1.66667	1		0.915254	3
1.66667	1		2.91525	4
1.66667	1		4.91525	4
1.66667	1		-1.08475	4
1.66667	1		-0.0847458	4
1.66667	1		3.91525	4
1.66667	1		2.91525	4
1.66667	1		1.91525	4
1.66667	1		2.91525	4
1.66667	1		1.91525	4
3.66667	2		0.915254	4
5.66667	2		2.91525	4
4.66667	2		-0.0847458	4
5.66667	2		5.91525	4
6.66667	2		1.91525	4
4.66667	2		0.915254	4
3.66667	2		1.91525	4
4.66667	2		-0.0847458	4
4.66667	2		0.915254	4
1.66667	2		-0.0847458	4
0.666667	2		-0.0847458	4
1.66667	2		-0.0847458	4
2.66667	2		-0.0847458	4
1.66667	2		-0.0847458	4
-0.333333	3		-1.08475	4
1.66667	3		1.91525	4
2.66667	3		-1.08475	4
1.66667	3		-0.0847458	4
-0.333333	3		-0.0847458	5
1.66667	3		1.91525	5
2.66667	3		-0.0847458	5
2.66667	3		-0.0847458	5
2.66667	3		-0.0847458	5
1.66667	3		0.915254	5
1.66667	3		-0.0847458	5
0.666667	3		0.915254	5
-0.333333	3		-0.0847458	5
4.66667	4		1.91525	5
0.666667	4		2.91525	5
-0.333333	4		-0.0847458	5
3.66667	4		-0.0847458	5
2.66667	4		-1.08475	5
2.66667	4		-0.0847458	5
3.66667	4		1.91525	6
2.66667	4		4.91525	6
0.666667	4		0.915254	6
2.66667	4		-0.0847458	6
0.666667	4		-0.0847458	6
1.66667	4		-0.0847458	6
2.66667	4		2.91525	6
3.66667	4		2.91525	6
1.66667	4		-0.0847458	6
0.666667	4		-0.0847458	6
4.66667	4		1.91525	6
0.666667	4		-0.0847458	6
0.666667	4		-1.08475	6
1.66667	4		3.91525	6
1.66667	4		-1.08475	6
1.66667	4		-1.08475	6
-0.333333	5		-1.08475	6
2.66667	5		1.91525	6
1.66667	5		-0.0847458	6
3.66667	5		-0.0847458	6
-0.333333	5		-1.97297	1
3.66667	5		-1.97297	1
1.66667	5		-1.97297	1
0.666667	5		-0.972973	1
2.66667	5		-0.972973	1
3.66667	5		-0.972973	1
1.66667	5		-0.972973	1
2.66667	5		-0.972973	1
1.66667	5		-0.972973	1
1.66667	5		-0.972973	1
1.66667	5		-0.972973	1
2.66667	5		-0.972973	1
1.66667	5		-0.972973	1
0.666667	5		-0.972973	1
2.66667	5		0.027027	1
4.66667	5		0.027027	1
1.66667	5		0.027027	1
0.666667	5		0.027027	1
2.66667	5		0.027027	1
0.666667	5		0.027027	1
0.666667	6		0.027027	1
0.666667	6		0.027027	1
1.66667	6		0.027027	1
0.666667	6		0.027027	1
0.666667	6		0.027027	1
0.666667	6		0.027027	1
3.66667	6		1.02703	1
0.666667	6		1.02703	1
1.66667	6		1.02703	1
0.666667	6		1.02703	1
0.666667	6		1.02703	1
2.66667	6		1.02703	1
1.66667	6		2.02703	1
2.66667	6		2.02703	1
0.666667	6		2.02703	1
2.66667	6		2.02703	1
0.666667	6		2.02703	1
0.666667	6		1.02703	2
-0.333333	6		4.02703	2
3.66667	6		3.02703	2
0.666667	6		4.02703	2
-1.43182	1		5.02703	2
-1.43182	1		3.02703	2
-1.43182	1		-0.972973	2
-1.43182	1		6.02703	2
-1.43182	1		3.02703	3
-1.43182	1		0.027027	3
-1.43182	1		2.02703	3
-1.43182	1		4.02703	3
-1.43182	1		0.027027	3
-1.43182	1		2.02703	3
-1.43182	1		1.02703	3
-0.431818	1		0.027027	3
-0.431818	1		3.02703	3
-0.431818	1		1.02703	3
-0.431818	1		4.02703	3
-0.431818	1		2.02703	3
-0.431818	1		2.02703	3
-0.431818	1		1.02703	3
-0.431818	1		2.02703	4
-0.431818	1		0.027027	4
-0.431818	1		1.02703	4
-0.431818	1		1.02703	4
-0.431818	1		1.02703	4
-0.431818	1		7.02703	4
-0.431818	1		0.027027	4
-0.431818	1		3.02703	4
-0.431818	1		0.027027	4
-0.431818	1		0.027027	4
-0.431818	1		-0.972973	5
-0.431818	1		-0.972973	5
-0.431818	1		0.027027	5
-0.431818	1		0.027027	5
-0.431818	1		1.02703	5
-0.431818	1		1.02703	5
-0.431818	1		1.02703	5
-0.431818	1		0.027027	5
-0.431818	1		1.02703	5
-0.431818	1		0.027027	5
-0.431818	1		0.027027	5
-0.431818	1		2.02703	5
-0.431818	1		2.02703	5
-0.431818	1		0.027027	5
-0.431818	1		1.02703	5
-0.431818	1		0.027027	5
-0.431818	1		0.027027	6
-0.431818	1		0.027027	6
-0.431818	1		2.02703	6
-0.431818	1		0.027027	6
-0.431818	1		0.027027	6
-0.431818	1		0.027027	6
-0.431818	1		1.02703	6
0.568182	1		0.027027	6
0.568182	1		3.02703	6
0.568182	1		3.02703	6
0.568182	1		1.02703	6
0.568182	1		-0.972973	6
0.568182	1		-1.83051	1
0.568182	1		-1.83051	1
0.568182	1		-1.83051	1
0.568182	1		-1.83051	1
0.568182	1		-1.83051	1
0.568182	1		-1.83051	1
0.568182	1		-1.83051	1
0.568182	1		-1.83051	1
0.568182	1		-0.830508	1
0.568182	1		-0.830508	1
0.568182	1		-0.830508	1
0.568182	1		-0.830508	1
0.568182	1		-0.830508	1
0.568182	1		-0.830508	1
0.568182	1		-0.830508	1
0.568182	1		-0.830508	1
0.568182	1		-0.830508	1
0.568182	1		-0.830508	1
0.568182	1		-0.830508	1
0.568182	1		-0.830508	1
1.56818	1		-0.830508	1
1.56818	1		-0.830508	1
1.56818	1		-0.830508	1
1.56818	1		-0.830508	1
1.56818	1		-0.830508	1
1.56818	1		-0.830508	1
1.56818	1		-0.830508	1
1.56818	1		0.169492	1
1.56818	1		0.169492	1
1.56818	1		0.169492	1
1.56818	1		0.169492	1
1.56818	1		0.169492	1
1.56818	2		0.169492	1
1.56818	2		0.169492	1
4.56818	3		0.169492	1
4.56818	3		0.169492	1
2.56818	3		0.169492	1
8.56818	3		0.169492	1
2.56818	3		0.169492	1
7.56818	3		0.169492	1
-1.83654	1		0.169492	1
-1.83654	1		0.169492	1
-1.83654	1		1.16949	1
-1.83654	1		1.16949	1
-1.83654	1		1.16949	1
-1.83654	1		1.16949	1
-1.83654	1		1.16949	1
-1.83654	1		1.16949	1
-1.83654	1		1.16949	1
-1.83654	1		1.16949	1
-1.83654	1		1.16949	1
-1.83654	1		2.16949	1
-1.83654	1		2.16949	1
-1.83654	1		2.16949	1
-0.836538	1		2.16949	1
-0.836538	1		2.16949	1
-0.836538	1		2.16949	1
-0.836538	1		2.16949	1
-0.836538	1		2.16949	1
-0.836538	1		0.169492	2
-0.836538	1		1.16949	2
-0.836538	1		2.16949	2
-0.836538	1		4.16949	2
-0.836538	1		2.16949	2
-0.836538	1		-0.830508	2
-0.836538	1		-0.830508	2
-0.836538	1		-0.830508	2
-0.836538	1		2.16949	2
-0.836538	1		-1.83051	2
-0.836538	1		-1.83051	2
-0.836538	1		0.169492	2
-0.836538	1		-0.830508	2
-0.836538	1		-0.830508	2
-0.836538	1		-0.830508	2
-0.836538	1		0.169492	3
-0.836538	1		1.16949	3
-0.836538	1		0.169492	3
-0.836538	1		1.16949	3
-0.836538	1		-0.830508	3
-0.836538	1		0.169492	3
-0.836538	1		0.169492	3
-0.836538	1		1.16949	3
-0.836538	1		2.16949	3
-0.836538	1		2.16949	3
0.163462	1		-0.830508	3
0.163462	1		1.16949	3
0.163462	1		0.169492	3
0.163462	1		-0.830508	3
0.163462	1		-0.830508	4
0.163462	1		0.169492	4
0.163462	1		0.169492	4
0.163462	1		0.169492	4
0.163462	1		1.16949	4
0.163462	1		2.16949	4
0.163462	1		3.16949	4
0.163462	1		0.169492	4
0.163462	1		0.169492	4
0.163462	1		1.16949	4
0.163462	1		4.16949	4
0.163462	1		5.16949	4
0.163462	1		2.16949	4
0.163462	1		0.169492	5
0.163462	1		-0.830508	5
0.163462	1		1.16949	5
0.163462	1		2.16949	5
0.163462	1		-0.830508	5
0.163462	1		0.169492	5
0.163462	1		0.169492	5
0.163462	1		0.169492	5
0.163462	1		2.16949	5
0.163462	1		4.16949	5
0.163462	1		4.16949	5
0.163462	1		1.16949	6
1.16346	1		0.169492	6
1.16346	1		0.169492	6
1.16346	1		0.169492	6
1.16346	1		-1.83051	6
1.16346	1		2.16949	6
1.16346	1		1.16949	6
1.16346	1		1.16949	6
1.16346	1		-0.830508	6
1.16346	1		2.16949	6
1.16346	1		1.16949	6
1.16346	1		-1.83051	6
1.16346	1		-0.830508	6
1.16346	1		3.16949	6
1.16346	1		-0.830508	6
1.16346	1		-1.71111	1
1.16346	1		-1.71111	1
1.16346	1		-1.71111	1
1.16346	1		-1.71111	1
1.16346	1		-1.71111	1
1.16346	1		-1.71111	1
1.16346	1		-1.71111	1
2.16346	1		-1.71111	1
2.16346	1		-1.71111	1
2.16346	1		-0.711111	1
2.16346	1		-0.711111	1
2.16346	1		-0.711111	1
2.16346	1		-0.711111	1
2.16346	1		-0.711111	1
2.16346	1		-0.711111	1
2.16346	1		-0.711111	1
2.16346	1		-0.711111	1
2.16346	2		-0.711111	1
0.163462	2		0.288889	1
5.16346	3		0.288889	1
0.163462	3		0.288889	1
1.16346	3		0.288889	1
3.16346	4		0.288889	1
3.16346	4		0.288889	1
0.163462	4		0.288889	1
1.16346	4		0.288889	1
5.16346	4		0.288889	1
1.16346	4		0.288889	1
5.16346	5		0.288889	1
7.16346	5		0.288889	1
3.16346	5		0.288889	1
2.16346	5		0.288889	1
1.16346	5		0.288889	1
7.16346	5		0.288889	1
0.163462	5		1.28889	1
3.16346	5		1.28889	1
3.16346	5		1.28889	1
2.16346	5		1.28889	1
1.16346	5		1.28889	1
6.16346	5		1.28889	1
-0.836538	5		1.28889	1
0.163462	6		1.28889	1
1.16346	6		2.28889	1
2.16346	6		2.28889	1
1.16346	6		2.28889	1
0.163462	6		2.28889	2
1.16346	6		2.28889	2
2.16346	6		3.28889	2
6.16346	6		2.28889	2
1.16346	6		0.288889	2
2.16346	6		-0.711111	2
1.16346	6		-0.711111	2
-1.16456	1		2.28889	3
-1.16456	1		-0.711111	3
-1.16456	1		0.288889	3
-1.16456	1		-1.71111	3
-1.16456	1		-0.711111	3
-1.16456	1		-0.711111	3
-1.16456	1		3.28889	3
-1.16456	1		-0.711111	3
-1.16456	1		6.28889	3
-1.16456	1		-1.71111	3
-1.16456	1		-1.71111	3
-1.16456	1		-1.71111	4
-1.16456	1		-0.711111	4
-1.16456	1		1.28889	4
-1.16456	1		-1.71111	4
-1.16456	1		4.28889	4
-1.16456	1		-0.711111	5
-1.16456	1		0.288889	5
-1.16456	1		-0.711111	5
-1.16456	1		-1.71111	6
-1.16456	1		2.28889	6
-1.16456	1		-0.711111	6
-0.164557	1		0.288889	6
-0.164557	1		-0.711111	6
-0.164557	1		1.28889	6
-0.164557	1		2.28889	6
-0.164557	1
-0.164557	1
-0.164557	1
-0.164557	1
-0.164557	1
-0.164557	1
-0.164557	1
-0.164557	1
-0.164557	1
-0.164557	1
-0.164557	1
-0.164557	1
-0.164557	1
-0.164557	1
-0.164557	1
-0.164557	1
-0.164557	1
-0.164557	1
-0.164557	1
-0.164557	1
-0.164557	1
-0.164557	1
-0.164557	1
-0.164557	1
-0.164557	1
-0.164557	1
-0.164557	1
-0.164557	1
0.835443	1
0.835443	1
0.835443	1
0.835443	1
0.835443	1
0.835443	1
0.835443	1
0.835443	1
0.835443	1
0.835443	1
0.835443	1
0.835443	1
0.835443	1
0.835443	1
0.835443	1
1.83544	1
1.83544	1
1.83544	1
1.83544	1
1.83544	1
1.83544	1
1.83544	1
1.83544	1
1.83544	1
1.83544	1
1.83544	2
-1.16456	2
2.83544	2
2.83544	2
5.83544	2
0.835443	2
6.83544	2
2.83544	2
-0.164557	2
5.83544	2
-1.16456	2
1.83544	2
-1.16456	2
-0.164557	2
-1.16456	2
-0.164557	2
-0.164557	2
-1.16456	2
-2.16456	3
3.83544	3
-1.16456	3
0.835443	3
4.83544	3
0.835443	3
-2.16456	3
-2.16456	3
-0.164557	3
-1.16456	3
-2.16456	3
-1.16456	3
0.835443	3
-0.164557	3
0.835443	3
-1.16456	3
0.835443	3
-0.164557	4
1.83544	4
1.83544	4
-0.164557	4
0.835443	4
1.83544	4
0.835443	4
1.83544	4
-2.16456	4
2.83544	4
0.835443	4
-1.16456	4
-1.16456	4
1.83544	4
-1.16456	4
-1.16456	4
-0.164557	4
-2.16456	4
0.835443	4
2.83544	4
-0.164557	4
2.83544	4
-1.16456	4
-1.16456	4
8.83544	4
0.835443	4
-1.16456	4
0.835443	5
-0.164557	5
-0.164557	5
-1.16456	5
5.83544	5
1.83544	5
-1.16456	5
-1.16456	5
0.835443	5
0.835443	5
2.83544	5
-1.16456	5
1.83544	5
0.835443	5
-1.16456	5
-1.16456	5
0.835443	5
-1.16456	5
-2.16456	5
1.83544	5
1.83544	5
1.83544	5
1.83544	5
-1.16456	6
1.83544	6
1.83544	6
0.835443	6
-0.164557	6
0.835443	6
-0.164557	6
-2.16456	6
3.83544	6
0.835443	6
-0.164557	6
-0.164557	6
3.83544	6
2.83544	6
