# Supplementary material for: Combining robotic training and inactivation of the healthy hemisphere restores pre-stroke motor patterns in mice
Source: eLife journal article supplement (doi:10.7554/elife.28662), 2017-12-27
Supplement: supp [file elife-28662-supp-v1.zip › elife_poa_e28662_Figure_9_source_data_1.xlsx]

## Sheet: a
	Spontaneous	SE Spontaneous	Robot+BoNT	SE Robot+BoNT	sham	SE Sham
mean	48.92	2.904	40.72	2.42	69.76	3.89

## Sheet: c
	Spontaneous	SE Spontaneous	Robot+BoNT	SE Robot+BoNT	sham	SE Sham
mean	22.944	1.965	16.25	0.993	40.944	2.995

## Sheet: e
	Spontaneous	SE Spontaneous	Robot+BoNT	SE Robot+BoNT
mean	1.127	0.06909	0.9656	0.03947
