# Supplementary material for: Combining robotic training and inactivation of the healthy hemisphere restores pre-stroke motor patterns in mice
Source: eLife journal article supplement (doi:10.7554/elife.28662), 2017-12-27
Supplement: supp [file elife-28662-supp-v1.zip › elife_poa_e28662_Figure_10_figure_supplement_1_source_data_1.xlsx]

## Sheet: a
	Robot+BoNT_ChR2	SE
baseline	12.6102	0.87314
2	33.9761	1.00591
9	30.9161	2.10883
16	24.2095	3.1854
23	22.2914	2.03676
30	22.0603	1.53641
