# Supplementary material for: Combining robotic training and inactivation of the healthy hemisphere restores pre-stroke motor patterns in mice
Source: eLife journal article supplement (doi:10.7554/elife.28662), 2017-12-27
Supplement: supp [file elife-28662-supp-v1.zip › elife_poa_e28662_Figure_10_source_data_1.xlsx]

## Sheet: c
Electrode	Sham	SE Sham	Spontaneous	SE Spontaneous	Robot+BoNT	SE Robot+BoNT
1_4	-0.978747	0.104128	-0.420364	0.0637649	-0.498669	0.0968974
5_8	-1.43895	0.0962984	-0.62381	0.102064	-0.64982	0.166864
9_12	-1.36467	0.0772187	-0.595574	0.0929946	-0.759907	0.159784
13_16	-1.05413	0.129181	-0.540475	0.0811743	-0.708276	0.149237

## Sheet: d
Electrode	Sham	SE Sham	Spontaneous	SE Spontaneous	Robot+BoNT	SE Robot+BoNT
1_4	-0.161555	0.121466	0.162753	0.0480886	0.00308627	0.0337942
5_8	-0.225663	0.120998	0.462511	0.0798944	0.0741034	0.0317727
9_12	-0.0742097	0.087228	0.619088	0.0905166	0.164743	0.0394978
13_16	0.173936	0.049105	0.578435	0.0978001	0.286593	0.0690603

## Sheet: e
Electrode	Sham	SE Sham	Spontaneous	SE Spontaneous	Robot+BoNT	SE Robot+BoNT
1_4	0.94555	0.183284	0.470637	0.0812058	0.594582	0.0327445
5_8	0.891783	0.172866	0.312046	0.0526409	0.55057	0.0340756
9_12	0.725715	0.0884573	0.353829	0.0406807	0.634547	0.0716705
13_16	0.618578	0.0602607	0.374675	0.0422266	0.619265	0.0560207
