# Supplementary figures and images for: Combining robotic training and inactivation of the healthy hemisphere restores pre-stroke motor patterns in mice
Source: eLife journal article supplement (doi:10.7554/elife.28662), 2017-12-27

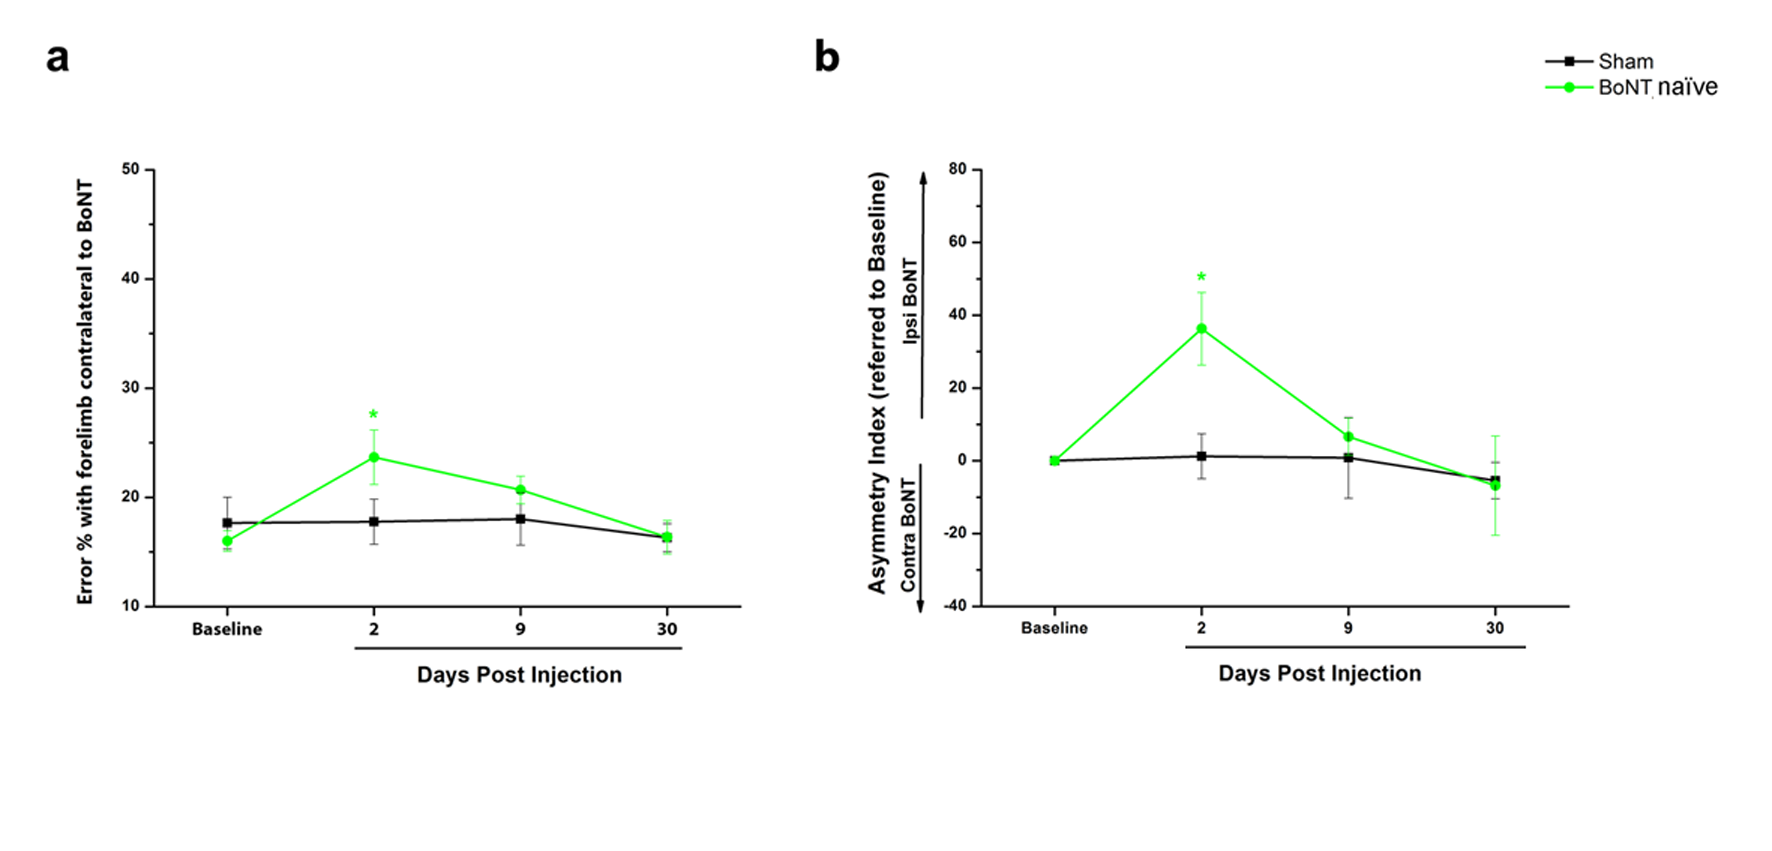

Supplement: supp [file elife-28662-supp-v1.zip › elife_poa_e28662_Figure_4_figure_supplement_1.tif]

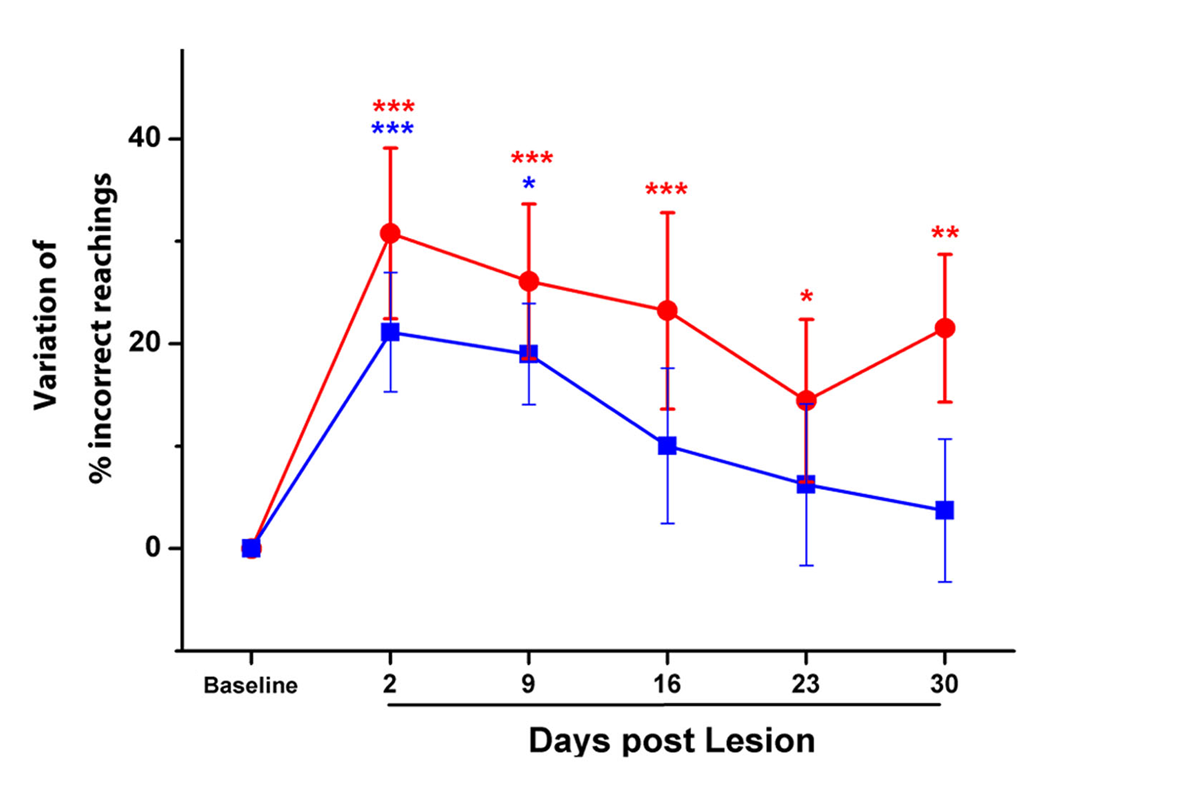

Supplement: supp [file elife-28662-supp-v1.zip › elife_poa_e28662_Figure_8_figure_supplement_1.tif]

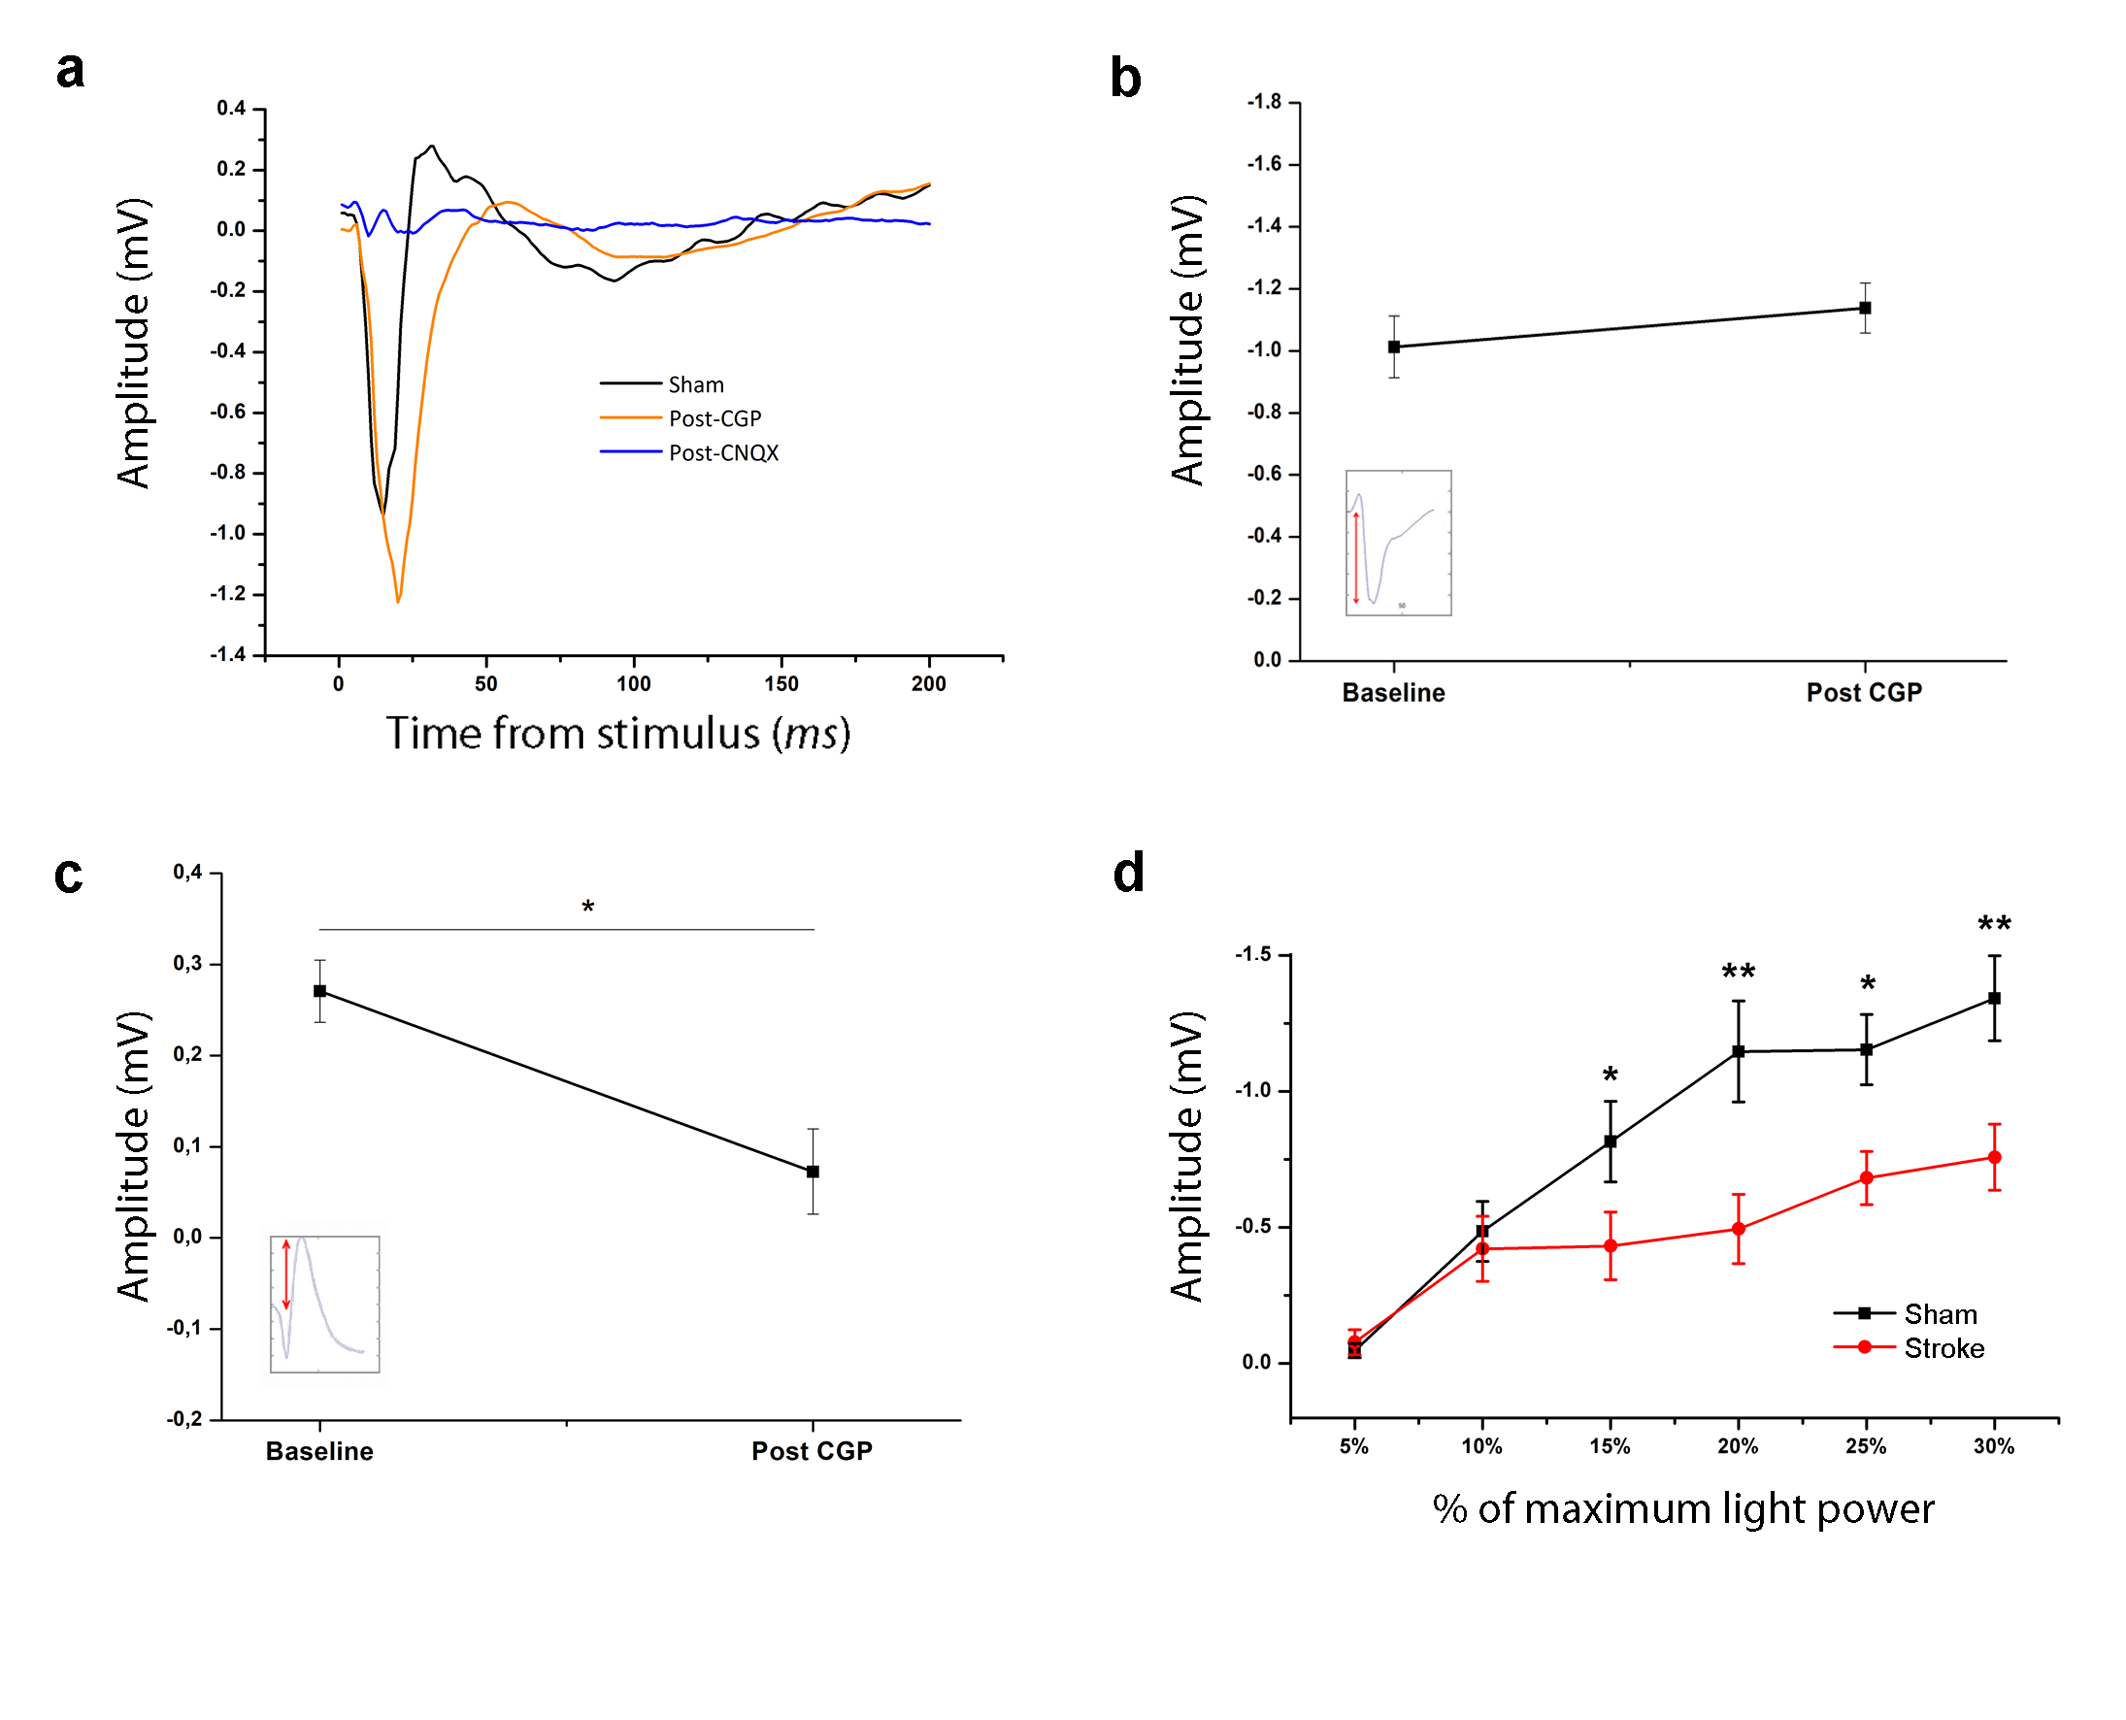

Supplement: supp [file elife-28662-supp-v1.zip › elife_poa_e28662_Figure_1_figure_supplement_1.tif]

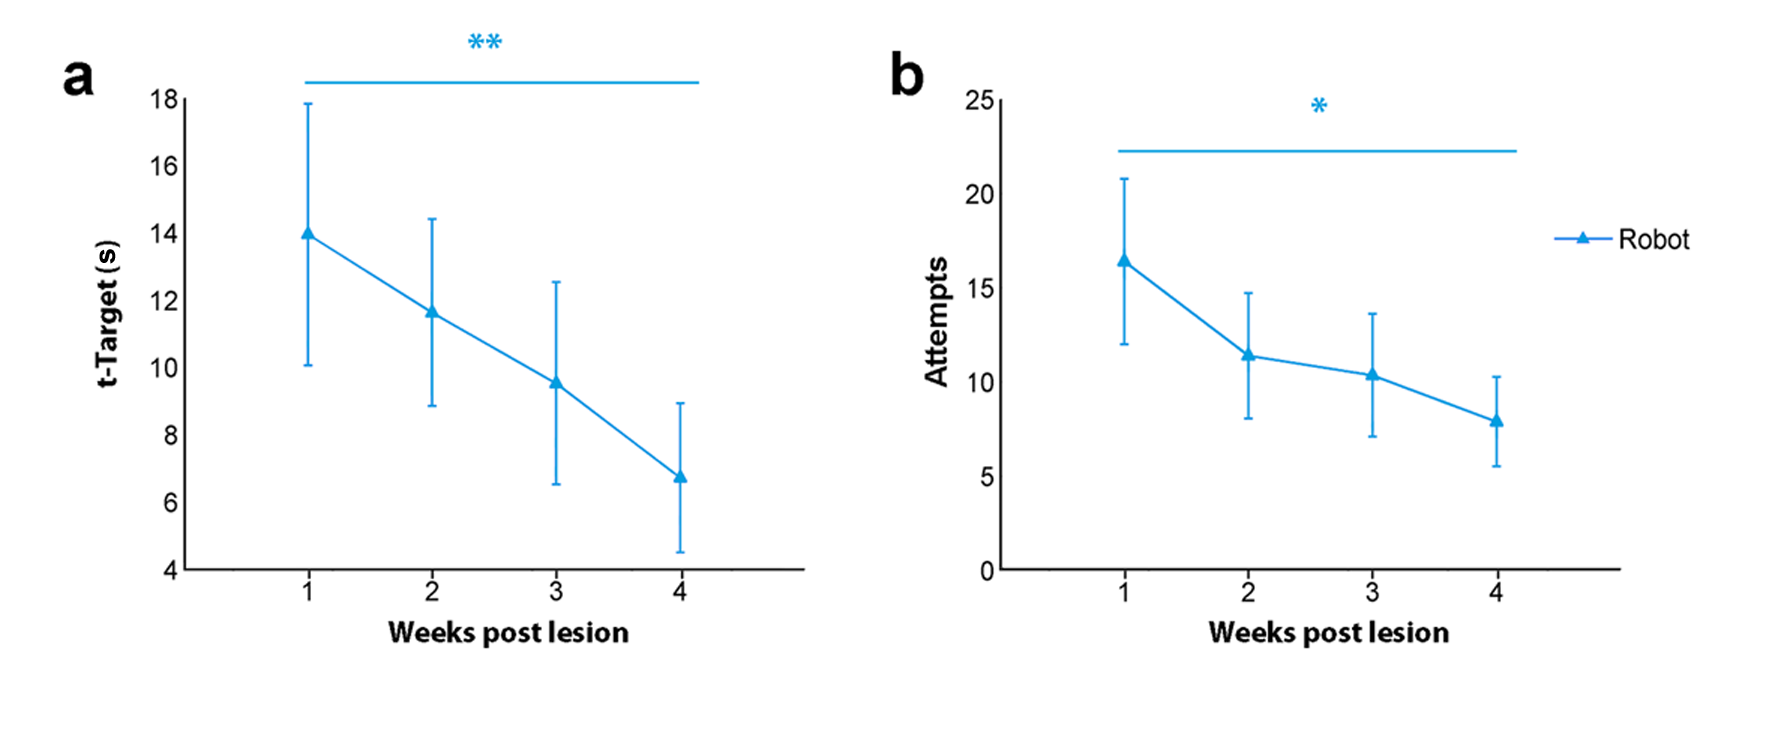

Supplement: supp [file elife-28662-supp-v1.zip › elife_poa_e28662_Figure_6_figure_supplement_1.tif]
